# Neurons of the inferior olive respond to broad classes of sensory input while subject to homeostatic control

## *Homeostatic complex spike firing*

**Chiheng Ju<sup>1,3</sup>, Laurens W.J. Bosman<sup>1,3\*</sup>, Tycho M. Hoogland<sup>1,2,3\*</sup>,  
Arthiha Velauthapillai<sup>1</sup>, Pavithra Murugesan<sup>1</sup>, Pascal Warnaar<sup>1</sup>, Mario Negrello<sup>1</sup>  
and Chris I. De Zeeuw<sup>1,2</sup>**

<sup>1</sup> Department of Neuroscience, Erasmus MC, 3015 GD Rotterdam, The Netherlands

<sup>2</sup> Netherlands Institute for Neuroscience, Royal Netherlands Academy of Arts and Sciences, 1105 BE Amsterdam, The Netherlands

<sup>3</sup> These authors contributed equally

\* Correspondence to Dr. Laurens Bosman, PO Box 2040, 3000 CA Rotterdam, The Netherlands, [l.bosman@erasmusmc.nl](mailto:l.bosman@erasmusmc.nl); or to Dr. Tycho Hoogland, PO Box 2040, 3000 CA Rotterdam, The Netherlands, [t.hoogland@erasmusmc.nl](mailto:t.hoogland@erasmusmc.nl)

[Keywords: cerebellum, inferior olive, homeostatic mechanisms, sensory integration, Purkinje cell, climbing fibre.](#)

This article was first published as a preprint: Ju C, Bosman LWJ, Hoogland TM, Velauthapillai A, Murugesan P, Warnaar P, Negrello M & De Zeeuw CI. (2018). Neurons of the inferior olive respond to broad classes of sensory input while subject to homeostatic control. bioRxiv. <https://doi.org/10.1101/379149>

- **Purkinje cells in the cerebellum integrate input coming from the sensory organs with output generated by the motor control centres of the brain.**
- **Purkinje cells use sensory input to adapt motor control to the particularities of the direct surroundings of the animal.**
- **This study focused on one of the two main input pathways to Purkinje cells, the climbing fibres originating in the inferior olive, and asked whether they could convey mono- or multi-sensory information.**
- **We show that climbing fibres convey multiple types of sensory information and that they provide a mosaic projection pattern facilitating sensory integration in multiple combinations over the cerebellar cortex.**
- **Our results reveal that climbing fibres employ a coding pattern that underlies homeostatic control implying that their firing probability depends on their recent history of activity.**

## **Abstract**

**Cerebellar Purkinje cells integrate sensory information with motor efference copies to adapt movements to behavioural and environmental requirements. They produce complex spikes that are triggered by the activity of climbing fibres originating in neurons of the inferior olive. These complex spikes can shape the onset, amplitude and direction of movements and the adaptation of such movements to sensory feedback. Clusters of nearby inferior olive neurons project to “microzones” which are parasagittally aligned stripes of Purkinje cells. Although it is known that sensory input preferentially recruits coherent climbing fibre activity within one or more microzones, it is still unclear whether individual Purkinje cells within a single microzone integrate climbing fibre input from multiple distinct sources, or how sensory-evoked responses depend on the stimulus strength and recent history of climbing fibre activity. By imaging complex spike responses in cerebellar lobule crus 1 to various types of sensory stimulation in awake mice we find that different sensory modalities and receptive fields have a mild, but consistent, tendency to converge on individual Purkinje cells. Purkinje cells encoding the same stimulus show increased complex spike coherence and tend to lie close together. Moreover, whereas complex spike firing is only mildly affected by variations in stimulus strength, it strongly depends on the recent history of climbing fibre activity. Our data point towards a mechanism in the olivo-cerebellar system that regulates complex spike firing during mono- or multisensory stimulation around a relatively low set-point, highlighting an integrative coding scheme of complex spike firing under homeostatic control.**

## 1 **Introduction**

2

3 The olivo-cerebellar system is paramount for sensorimotor integration during motor  
4 behaviour. The climbing fibres that originate in the inferior olive and cause complex spike  
5 firing in cerebellar Purkinje cells encode both unexpected and expected sensory events and  
6 affect initiation, execution as well as adaptation of movements (Albus, 1971; Welsh *et al.*,  
7 1995; Kitazawa *et al.*, 1998; Gibson *et al.*, 2004; Bosman *et al.*, 2010; Yang & Lisberger,  
8 2014; Ten Brinke *et al.*, 2015; Streng *et al.*, 2017; Apps *et al.*, 2018; Herzfeld *et al.*, 2018;  
9 Junker *et al.*, 2018; Romano *et al.*, 2018). Complex spike firing frequency is typically  
10 sustained around 1 Hz and not substantially affected by the behavioural state, although short-  
11 lived increases or decreases in firing occur (Bloedel & Ebner, 1984; Mukamel *et al.*, 2009;  
12 Bosman *et al.*, 2010; Zhou *et al.*, 2014; Hoogland *et al.*, 2015; Warnaar *et al.*, 2018). To date,  
13 the paradox between the persistence of complex spike firing and the behavioural relevance of  
14 individual complex spikes is still largely unresolved.

15         Whereas the afferents of Purkinje cells, including not only the climbing fibres but also  
16 the parallel fibres and axons of interneurons, all diverge, their efferents strongly converge  
17 upon the cerebellar nuclei, ultimately integrating many different inputs from the brain  
18 (Harvey & Napper, 1991; Sugihara *et al.*, 2001; Person & Raman, 2011). The parallel fibres  
19 are oriented in a transverse direction along the lobular axes, while the climbing fibres and  
20 axons of the interneurons are running perpendicularly to them in line with the sagittal  
21 orientation of the dendritic trees of Purkinje cells (Andersen *et al.*, 1964; Szentágothai, 1965;  
22 Sugihara *et al.*, 1999; Sullivan *et al.*, 2005; Gao *et al.*, 2006; Sugihara *et al.*, 2009; Ruigrok,  
23 2011; Cerminara *et al.*, 2015; Apps *et al.*, 2018). Interestingly, the intrinsic biochemical  
24 nature as well as electrophysiological profile of individual Purkinje cells follows the  
25 organization of the climbing fibres so that Purkinje cells located in the same sagittal module  
26 receive climbing fibre input from the same olivary subnucleus and have similar identity  
27 properties, setting them apart from Purkinje cells in neighbouring modules (Xiao *et al.*, 2014;  
28 Zhou *et al.*, 2014; Cerminara *et al.*, 2015; De Zeeuw & Ten Brinke, 2015; Tsutsumi *et al.*,  
29 2015; Suvrathan *et al.*, 2016). Accordingly, Purkinje cell responses following electrical  
30 stimulation of major nerves of cat limbs largely adhere to the parasagittal organization of the  
31 climbing fibre zones (Oscarsson, 1969; Groenewegen *et al.*, 1979), which in turn can be  
32 further differentiated into smaller microzones based upon their response pattern to tactile  
33 stimulation of a particular spot on the body (Ekerot *et al.*, 1991; Apps & Garwicz, 2005;  
34 Ozden *et al.*, 2009; De Zeeuw *et al.*, 2011). Possibly, differential sensory maps even occur at

35 the submicrozonal and individual Purkinje cell level, but this has to our knowledge not been  
36 investigated yet. In particular, it remains unclear to what extent different types of sensory  
37 inputs can drive complex spikes within the same individual Purkinje cells and/or their direct  
38 neighbours and how the strength as well as the history of these inputs influences the  
39 distribution of climbing fibre activity.

40 Here, we studied the impact of minimal stimuli of distinct sensory modalities on  
41 complex spike firing of Purkinje cells in crus 1 of awake mice using *in vivo* two-photon  $\text{Ca}^{2+}$   
42 imaging. We found that different sensory streams appear to converge on individual inferior  
43 olivary neurons and thereby Purkinje cells, that sensory stimulation primarily affects the  
44 timing of the complex spikes rather than their rate, that the strength of complex spike  
45 responses varied seamlessly from non-responsive to highly responsive, that a recent history of  
46 high activity leads to a future of low activity, and that Purkinje cells that respond to the same  
47 stimulus tend to be located in each other's vicinity, increasing the coherence of their  
48 responses. Together, our data indicate that subtle and local sensory inputs can recruit mosaic  
49 ensembles of Purkinje cells, employing population coding in a spatially and temporally  
50 dynamic way that is in line with homeostatic control.

## 51 **Methods**

52

### 53 *Ethical approval*

54 All experimental procedures involving animals were in agreement with Dutch and European  
55 legislation and guidelines as well as with the ethical principles of The Journal of Physiology.  
56 The experiments were approved in advance by an independent ethical committee (DEC  
57 Consult, Soest, The Netherlands) as required by Dutch law and filed with approval numbers  
58 EMC2656, EMC3001 and EMC3168. Experiments were performed in compliance with the  
59 guidelines of the Animal Welfare Board of the Erasmus MC.

60

### 61 *Animals and surgery*

62 Mice were group housed until the day of the experiment and kept under a regime with 12 h  
63 light and 12 h dark with food and water available *ad libitum*. The mice had not been used for  
64 other experiments prior to the ones described here.

65 For the experiments performed in awake mice, we recorded from in total 66 field of  
66 views located in cerebellar lobule crus 1 of 29 male C57Bl/6J mice of 4-12 weeks of age  
67 (Charles Rivers, Leiden, The Netherlands). Prior to surgery, mice were anaesthetized using  
68 isoflurane (initial concentration: 4% V/V in O<sub>2</sub>, maintenance concentration: ca. 2% V/V) and  
69 received Carprofen (Rimadyl, 5 mg/ml subcutaneously) to reduce post-surgical pain. Before  
70 the start of the surgery, the depth of anaesthesia was verified by the absence of a reaction to  
71 an ear pinch. To prevent dehydration, mice received 1 ml of saline s.c. injection before the  
72 surgeries commenced. Eyes were protected using eye ointment (Duratears, Alcon, Fort Worth,  
73 TX, USA). Body temperature was maintained using a heating pad in combination with a  
74 rectal thermometer. During surgery, we attached a metal head plate to the skull with dental  
75 cement (Superbond C&B, Sun Medical Co., Moriyama City, Japan) and made a craniotomy  
76 with a diameter of approximately 2 mm centred on the medial part of crus 1 ipsilateral to the  
77 side of somatosensory stimulation. The dura mater was preserved and the surface of the  
78 cerebellar cortex was cleaned with extracellular solution composed of (in mM) 150 NaCl, 2.5  
79 KCl, 2 CaCl<sub>2</sub>, 1 MgCl<sub>2</sub> and 10 HEPES (pH 7.4, adjusted with NaOH). After the surgery, the  
80 mice were allowed to recover from anaesthesia for at least 30 minutes. Subsequently, the mice  
81 were head-fixed in the recording setup and they received a bolus-loading of the Ca<sup>2+</sup> indicator  
82 Cal-520 (0.2 mM; AAT Bioquest, Sunnyvale, CA) (Tada *et al.*, 2014). The dye was first  
83 dissolved with 10% w/V Pluronic F-127 in DMSO (Invitrogen, Thermo Fisher Scientific,  
84 Waltham, MA, USA) and then diluted 20 times in the extracellular solution. The dye solution

85 was pressure injected into the molecular layer (50–80  $\mu\text{m}$  below the surface) at 0.35 bar for 5  
86 min. Finally, the brain surface was covered with 2% agarose dissolved in saline (0.9% NaCl)  
87 in order to reduce motion artefacts and prevent dehydration.

88 For the experiments on single-whisker stimulation we made recordings under  
89 anaesthesia on 17 male C57BL/6J mice of 4-12 weeks of age. The procedure was largely the  
90 same as described above, but instead of isoflurane we used ketamine/xylazine as anaesthetic  
91 (i.p. injection via butterfly needle, initial dose: 100 mg/kg and 10 mg/kg, respectively;  
92 maintenance dose: approximately 60 mg/kg/h and 3 mg/kg/h, respectively). The mice  
93 remained under anaesthesia until the end of the recording. A subset of these experiments was  
94 performed with 0.2 mM Oregon Green BAPTA-1 AM dye (Invitrogen) as this dye has been  
95 more widely used than Cal-520 (e.g., (Stosiek *et al.*, 2003; Ozden *et al.*, 2009; Schultz *et al.*,  
96 2009; Hoogland *et al.*, 2015). Oregon Green BAPTA-1 AM was dissolved and applied in the  
97 same way as Cal-520. We found that Cal-520 had a superior signal-to-noise ratio under our  
98 experimental conditions. As a consequence, the observed event rate was lower in the  
99 experiments using OGB-1 (OGB-1:  $0.45 \pm 0.26$  Hz;  $n = 172$  cells; Cal-520:  $0.72 \pm 0.40$  Hz;  $n$   
100  $= 43$  cells; median  $\pm$  IQR;  $U = 1719.0$ ,  $p < 0.001$ , Mann-Whitney test). The observed  
101 frequency range using Cal-520 was comparable to that found using *in vivo* single-unit  
102 recordings under ketamine/xylazine anaesthesia:  $0.6 \pm 0.1$  Hz (Bosman *et al.*, 2010). Despite  
103 an underestimation of the complex spike rate using OGB-1, we found that the ratios of  
104 Purkinje cells that responded to single whisker stimulation were similar for both dyes (OGB-  
105 1: 89 out of 373 cells (24%); Cal-520: 35 out of 152 cells (23%);  $p = 0.910$ ; Fisher's exact  
106 test). For this reason, we combined the data from both dyes. For the analysis presented in Fig.  
107 7, we included only those cells that could be recorded during all stimulus conditions. All  
108 experiments using awake data were obtained with Cal-520.

109 At the end of each experiment, the mice were killed by cervical dislocation under  
110 isoflurane or ketamine/xylazine anaesthesia after which the brain was removed and the  
111 location of the dye injection in crus 1 was verified by epi-fluorescent imaging.

112

### 113 *In vivo two-photon Ca<sup>2+</sup> imaging*

114 Starting at least 30 min after dye injection, *in vivo* two-photon Ca<sup>2+</sup> imaging was performed of  
115 the molecular layer of crus 1 using a setup consisting of a Ti:Sapphire laser (Chameleon  
116 Ultra, Coherent, Santa Clara, CA, USA), a TriM Scope II system (LaVisionBioTec, Bielefeld,  
117 Germany) mounted on a BX51 microscope with a 20x 1.0 NA water immersion objective  
118 (Olympus, Tokyo, Japan) and GaAsP photomultiplier detectors (Hamamatsu, Iwata City,

119 Japan). A typical recording sampled a field of view of 40 x 200  $\mu\text{m}$  with a frame rate of  
120 approximately 25 Hz.

121

### 122 *Sensory stimulation*

123 Cutaneous stimuli were delivered to four defined regions on the left side of the face,  
124 ipsilateral to side of the craniotomy. These regions were the whisker pad, the cheek posterior  
125 to the whisker pad, the upper lip and the lower lip. Stimuli were applied using a Von Frey  
126 filament (Touch Test Sensory Evaluator 2.83, Stoelting Co., IL, USA) attached to a piezo  
127 linear drive (M-663, Physik Instrumente, Karlsruhe, Germany). Prior to the set of experiments  
128 described here, we tested a series of 8 Von Frey filaments with a stiffness range from 0.02 g  
129 to 1.4 g in awake head-fixed mice to select the optimal force for these experiments. We  
130 selected the 0.07 g (0.686 mN) filament because this filament induced a mild reaction in the  
131 mouse, but no signs of a nociceptive response (cf. Chaplan *et al.* (1994)). The touch time was  
132 fixed at 100 ms. As a control, we moved the stimulator without touching the face (“sound  
133 only” condition). Visual stimuli were delivered as 10 ms pulses using a 460 nm LED (L-  
134 7104QBC-D, Kingbright, CA, USA). The stimulation frequency was fixed at 1 Hz and the  
135 different stimuli were applied in a random order. Video-recordings of the eye, made under  
136 infrared illumination, revealed that the mice did not make eye movements in response to the  
137 LED flash, but they did show reflexive pupil constriction (*data not shown*).

138 Single whiskers were stimulated using a piezo linear drive (M-663, Physik Instrumente)  
139 while using a deflection of 6°. It took the stimulator approximately 30 ms to reach this  
140 position. At the extreme position, the stimulator was paused for 150 ms before returning to the  
141 neutral position. The stimulator was designed to minimize contact with other whiskers. Each  
142 stimulation experiment consisted of five sessions in random order. During each block one of  
143 the ipsilateral whiskers B2, C1, C2, C3 and D2 was stimulated. Each session consisted of 150  
144 stimuli at 2 or 3 Hz.

145

### 146 *Complex spike detection*

147 Image analysis was performed offline using custom made software as described and validated  
148 previously (Ozden *et al.*, 2008; Ozden *et al.*, 2012; De Gruijl *et al.*, 2014). In short,  
149 independent component analysis was applied to the image stack to discover masks describing  
150 the locations of individual Purkinje cell dendrites (e.g., see Fig. 2A). For each field of view  
151 the mask was generated only once, so that the same Purkinje cells were analysed for  
152 subsequent recordings of different stimulus conditions enabling paired comparisons.



153 Experiments during which spatial drift occurred were discarded from subsequent analysis.  
154 The fluorescence values of all pixels in each mask were averaged per frame. An 8% rolling  
155 baseline from a time window of 0.5 ms was subtracted from the average fluorescence per  
156 mask (Ozden et al. 2012), after which  $\text{Ca}^{2+}$  transient events were detected using template  
157 matching

158

### 159 *Statistical analysis*

160 In general, we first tested whether parameter values were distributed normally using one-  
161 sample Kolmogorov-Smirnov or Shapiro-Wilk tests. If not, non-parametric tests were applied.  
162 When multiple tests were used, Benjamini-Hochberg correction for multiple comparisons was  
163 applied. For each experiment, stimuli were given in a random sequence. Identification of  
164 Purkinje cell dendrites and event extraction were performed by a researcher who was blind to  
165 the type of stimulus. For the experiments characterizing response characteristics of individual  
166 Purkinje cells, we compared the fraction of responsive Purkinje cells, the response latency and  
167 the response peak. After extracting the  $\text{Ca}^{2+}$  transient event times, peri-stimulus time  
168 histograms (PSTHs) were constructed using the inter-frame time (approx. 40 ms) as bin size.  
169 Stacked line plots of Purkinje cell PSTHs were sorted by weak to strong peak responses. The  
170 data were normalized such that the top represents the average responses of all Purkinje cells.  
171 Statistical significance of responses occurring within 200 ms from stimulus onset was  
172 evaluated using a threshold of the mean + 3 s.d. of the firing rate during the 500 ms prior to  
173 stimulus onset (300 ms for the single whisker stimulation experiments, as they were  
174 performed with a higher stimulation frequency).

175 To calculate whether two or more inputs converged on single Purkinje cells we used a  
176 bootstrap method. First, we determined the fraction of responsive cells for each parameter and  
177 compared these to a randomly generated number between 0 and 1 as taken from a uniform  
178 distribution. If for each input the randomly generated numbers were lower than the measured  
179 fractions, we considered them as responsive to all stimuli. This procedure was repeated  
180 10,000 times and the average and standard deviation were derived and used to calculate the Z  
181 score of the experimental data. All bootstrap procedures were performed using custom-written  
182 code in LabVIEW (National Instruments, Austin, TX, USA).

183 The distributions of pairs of Purkinje cells, either both responsive to a given stimulus  
184 (“responsive pairs”) or one cell being responsive and the other not (“heterogeneous pairs”),  
185 were tested using two-dimensional Kolmogorov-Smirnov tests performed in MATLAB  
186 (MathWorks, Natick, MA, USA). Aggregate PSTHs (Fig. 9) were constructed and evaluated

187 as described before (Romano *et al.*, 2018). Briefly, we calculated per individual frame the  
188 number of simultaneously occurring events and colour coded these in a PSTH combining data  
189 from all dendrites in a field of view. Based upon the total number of complex spikes and  
190 dendrites per recording, we calculated the expected number of simultaneous complex spikes  
191 per individual frame based upon a Poisson distribution. The actual number of simultaneous  
192 complex spikes was compared to this calculated distribution and a  $p$  value was derived for  
193 each number based upon the Poisson distribution (using custom-written software in  
194 MATLAB and LabVIEW). Correlation analysis was performed in SigmaPlot (Systat  
195 Software, San Jose, CA, USA) and, unless mentioned otherwise, the rest of the statistical tests  
196 were performed using SPSS (IBM, Armonk, NY, USA).

## 197 **Results**

198

### 199 *Climbing fibre responses to tactile, auditory and/or visual input*

200 Little is known about the distribution and convergence of different types of climbing fibre-  
201 mediated sensory input at the level of individual, nearby Purkinje cells. Here, we performed  
202 two-photon  $\text{Ca}^{2+}$  imaging of Purkinje cells of awake mice to record complex spikes responses  
203 to various types of sensory stimulation related to the face of the mice. The recordings were  
204 made in crus 1 as this lobule is known to receive sensory input from the oro-facial region  
205 (Fig. 1A) (Shambes *et al.*, 1978; De Zeeuw *et al.*, 1990; Yatim *et al.*, 1996; Apps & Hawkes,  
206 2009; Bosman *et al.*, 2011; De Gruijl *et al.*, 2013; Kubo *et al.*, 2018). The configurations and  
207 positions of individual Purkinje cell dendrites were detected using independent component  
208 analysis (Fig. 1B).  $\text{Ca}^{2+}$  transients were isolated per dendrite by a template-matching  
209 procedure that reliably detects complex spikes (Ozden *et al.*, 2008; Najafi & Medina, 2013;  
210 De Gruijl *et al.*, 2014) (Fig. 1C-E).

211 We started our study of sensory responses by using air puff stimulation of the large  
212 facial whiskers, which is a relatively strong stimulus. In line with previous studies (Axelrad &  
213 Crepel, 1977; Brown & Bower, 2002; Bosman *et al.*, 2010; Apps *et al.*, 2018; Romano *et al.*,  
214 2018), we found that air puff stimulation to the whiskers evoked complex spike responses in  
215 many Purkinje cells (e.g., in 19 out of 19 Purkinje cells in the example illustrated in Fig. 2). In  
216 total, 102 out of the 117 (87%) cells analysed were considered to be responsive to such a  
217 stimulus, implying that the peak responses of these cells exceeded the threshold of the average  
218 + 3 s.d. of the pre-stimulus period.

219 To address whether localized and more subtle stimuli recruited smaller groups of  
220 Purkinje cells, maybe even subsets of microzones, we subsequently applied gentle tactile  
221 stimulation at four facial locations: the whisker pad, the cheek posterior to the whisker pad,  
222 the upper lip and the lower lip (Fig. 3A). The stimuli were given using a Von Frey filament  
223 (target force = 0.686 mN) attached to a piezo actuator. The stimulus strength was carefully  
224 calibrated to avoid inducing responses from neighbouring skin areas or nociceptive responses  
225 (see Methods). When we evaluated the strength of the Purkinje cell responses to any of the  
226 four tactile stimuli (998 stimulus conditions in 282 Purkinje cells), a skewed, but continuous  
227 distribution was found (Fig. 3B). Moreover, also for individual stimulus locations skewed, but  
228 continuous distributions of response strengths were found, with the upper lip being the least  
229 sensitive of the four facial areas (Fig. S2). In other words, our data set contained Purkinje  
230 cells that did not respond at all as well as cells that responded strongly, with all gradients in

231 between. Thus, a distinction between “responsive” and “non-responsive” Purkinje cells  
232 involved a somewhat arbitrary distinction, prompting us to present most of the subsequent  
233 analyses using the entire dataset.

234         Given that the touches were delivered by a piezo-actuator that made a weak but  
235 audible sound, we also tested whether Purkinje cells responded to this sound in the absence of  
236 touch. This was the case, and, as expected, the “sound-only” stimulus evoked the weakest  
237 responses of all stimuli ( $p < 0.001$ ; Kruskal-Wallis test; Fig. S2B). For comparison, we also  
238 included a visual stimulation, consisting of a brief flash of a blue LED. This stimulus evoked  
239 responses with a similar strength as the whisker pad and lower lip stimulation, but with a  
240 latency that was remarkably long (Fig. S2A).

241         To facilitate a quantitative comparison between the stimulus conditions, we  
242 subsequently focused on the subset of obvious responses, defined as having a peak amplitude  
243 exceeding our threshold for significance set at the average + 3 s.d. of the pre-stimulus period.  
244 Among these “significantly responding” Purkinje cells, we found trends as in the entire  
245 population: the lower lip recruited the strongest responses, directly followed by the whisker  
246 pad and visual stimulation, while upper lip and sound-only stimulations were less effective  
247 (Fig. 3C-E; Table 1). We also confirmed the remarkably long latency, typically more than 100  
248 ms, for the visually evoked responses ( $p < 0.001$  compared to the tactile stimuli; Kruskal  
249 Wallis test; Fig. 3F; Table 1).

250

### 251 *Convergence of sensory inputs*

252 Next, we addressed the question whether Purkinje cells have a preference to respond to one or  
253 multiple types of stimulation. To this end, we made for each combination of two stimuli a  
254 scatter plot of the response strengths of each individual Purkinje cell. For each and every  
255 combination, correlation regression analysis revealed a positive correlation, implying that a  
256 stronger response to one stimulus typically implied also a stronger response to the other (Fig.  
257 4A). These correlations, although weak, were statistically significant for all combinations  
258 except in two cases (i.e., upper lip vs. sound only and upper lip vs. visual stimulation; Table  
259 2). The regression lines deviated from the 45° line, suggesting that, although there is a  
260 tendency at the population level to combine inputs, individual Purkinje cells can display  
261 specificity for a given stimulus. The Venn diagrams in Fig. 4B-C highlight the degree of  
262 overlap for all combinations of two and three stimuli. For all combinations we found some but  
263 no complete overlap. Remarkably, when comparing the observed overlap with the expected  
264 overlap based upon a random distribution, all combinations occurred more often than

265 predicted. We performed a bootstrap analysis (see Methods) to infer statistical significance  
266 and indeed, most combinations were observed significantly more often than expected from a  
267 random distribution of inputs (Fig. 4B-C, Tables 3 and 4). This also included the visual  
268 stimulation, so that those Purkinje cells responding to a tactile stimulus typically were  
269 responsive to visual stimulation as well.

270 With an apparent lack of input-specificity, one might wonder whether Purkinje cells in  
271 crus 1 are encoding specific sensory events or, alternatively, respond indifferently to any  
272 external trigger. In this respect, especially the response pattern to the sound only stimulus is  
273 noticeable. A weak, but audible sound was generated by the piezo actuator used to deliver the  
274 tactile stimuli. Hence, all tactile stimuli also involved sound. Nevertheless, the Venn diagrams  
275 in Fig. 4B show that there are Purkinje cells that responded statistically significantly to sound  
276 only, but not to sound and touch delivered simultaneously. This could be taken as an  
277 argument against the input-specificity of Purkinje cells. However, one should keep in mind  
278 that the separation between “responsive” and “non-responsive” Purkinje cells is arbitrarily (cf.  
279 Fig. 3B), and to be able to draw such a conclusion, there should be a consistent absence of  
280 preferred responses. The sound only stimulus was found to be the weakest stimulus (Figs. 3E  
281 and S2B) and pair-wise comparisons of the response strengths had a strong bias towards the  
282 stimuli involving touch (Fig. 4A). This is further illustrated in a single experiment, directly  
283 comparing the responses evoked by whisker pad touch and sound only stimulation. Four  
284 randomly selected Purkinje cells from this experiment failed to show a response to sound only  
285 stimuli in the absence of touch responses (Fig. S3A-E). This was confirmed by the group-wise  
286 analysis of all Purkinje cells in this experiment, demonstrating a clear preference for the  
287 whisker pad stimulation over the sound-only stimulus (Fig. S3F-G). Overall we conclude that,  
288 although the observed responses to mild sensory stimulation are typically weak and  
289 convergent, a certain degree of input-specificity was observed in Purkinje cells of crus 1.

290

### 291 *Stimulus strength has limited impact on complex spike responses*

292 To avoid recruiting responses from adjacent areas, we used weak stimulation strengths (Figs.  
293 3 and 4). Under anaesthesia, the strength of a stimulus affects the complex spike response  
294 probability (Eccles *et al.*, 1972; Bosman *et al.*, 2010). This finding has been reproduced in  
295 awake mice using variations in duration and strength of peri-ocular air puff stimulation  
296 (Najafi *et al.*, 2014). As a consequence, our approach using weak stimuli could have led to an  
297 underestimation of the number and spatial extent of sensory climbing fibre responses. To  
298 study whether the stimulus strength could also have affected our results, we performed an

299 experiment in which we stimulated all whiskers mechanically with three different strengths,  
300 the largest of which was identical to the maximal stimulus we previously applied under  
301 anaesthesia (Bosman *et al.*, 2010). The chosen stimulus intensities maximized the variation in  
302 kinetic energy, which was the most salient feature for barrel cortex neurons (Arabzadeh *et al.*,  
303 2004). Stimuli were randomly intermingled (Fig. 5A-B). Raw traces indicate that, even at the  
304 ensemble level, (relatively) weak stimuli do not trigger responses at every trial and  
305 spontaneous complex spike firing may occasionally appear as peaks prior to stimulus onset  
306 (Figs. 2C, 5C and 5D).

307         Of the 340 Purkinje cells tested in awake mice, 209 (61%) responded significantly to  
308 at least one stimulus strength. In these 209 Purkinje cells, we compared the complex spike  
309 responses across three intensities. The weak and the moderate intensities (1 mm displacement  
310 reached in 62 ms and 2 mm displacement reached in 31 ms, respectively) showed a  
311 comparable number of responses and only the strong stimulus intensity (4 mm reached in 16  
312 ms) evoked significantly more responses ( $F(2) = 57.160$ ,  $p < 0.001$ , Friedman's test) (Figs.  
313 5D-F, S4A). Despite being 16 times faster (250 mm/s instead of 16 mm/s), the strongest  
314 stimulus recruited only 28% (measured as peak response) or 34% (measured as integral of  
315 whole response period) more complex spikes than the weak stimulus (Fig. 5E-F). The same  
316 analysis on the whole population of Purkinje cells, including those that did not show a  
317 statistically significant response, revealed even less of an impact of stimulus strength (Fig.  
318 S4B). We therefore conclude that the complex spike response poorly encodes velocity of  
319 whisker displacement in awake mice and that – within boundaries – using stronger stimuli  
320 does not necessarily lead to qualitatively different results.

321

### 322 *Functionally equivalent Purkinje cells tend to group together*

323 So far, we mainly found an abundance of weak and not very specific complex spike responses  
324 to mild sensory stimulation. One way in which such weak responses at the cellular level could  
325 still have considerable effects on the network level would be when functionally equivalent  
326 Purkinje cells would lie together in microzones. Indeed, as the Purkinje cells of each  
327 microzone project to a group of adjacent neurons in the cerebellar nuclei (Voogd &  
328 Glickstein, 1998; Apps & Hawkes, 2009), population encoding of sensory events may be a  
329 form of functional signalling in the olivo-cerebellar system. Fig. 6 illustrates to what extent  
330 adjacent Purkinje cells have similar stimulus response probabilities. In this example, Purkinje  
331 cells reacting strongly to whisker pad stimulation are grouped together, but such a spatial  
332 clustering does not seem to be perfect, as also a few strongly responsive cells are located in

333 between less responsive Purkinje cells (Fig. 6A) and as upper lip-responsive Purkinje cells are  
334 sparsely distributed across the same area (Fig. 6B). We reasoned that spatial clustering should  
335 imply that two neighbouring cells have more similar response probabilities than randomly  
336 selected cells from the same field of view. This turned out to be the case, but only if we  
337 confined our focus to Purkinje cells with statistically significant responses ( $Z > 3$ ) (Figs. 6C  
338 and 6D). Thus, especially the Purkinje cells with stronger responses to a given stimulus type  
339 were found to be located more closely together than could be expected from a random  
340 distribution.

341

#### 342 *Single whisker responses in Purkinje cells*

343 Using our tactile stimuli we demonstrated a tendency of nearby Purkinje cells to encode the  
344 same stimulus. To study whether this would hold true for even smaller receptive fields we  
345 turned to single whisker stimulation. Using single-unit electrophysiological recordings we  
346 have previously shown that stimulation of a single whisker is sufficient to evoke complex  
347 spike responses (Bosman *et al.*, 2010). Individual whiskers can be reliably identified across  
348 mice and as such they can be qualified as minimal reproducible receptive fields. We repeated  
349 our previous single-whisker stimulation experiments now using two-photon  $\text{Ca}^{2+}$  imaging  
350 focusing on five whiskers that were stimulated individually in a random sequence. To prevent  
351 spontaneous whisking and thereby interference by other whiskers, these experiments were  
352 (unlike all other experiments in this study) performed under anaesthesia. In general, the  
353 responses were specific, as many Purkinje cells responded to a particular whisker, but not to  
354 its neighbouring whiskers (Fig. 7A). Overall, of the 148 Purkinje cells tested, 31 (21%)  
355 responded significantly to only one of the five whiskers tested, 14 (10%) to two and 5 (3%) to  
356 three whiskers (Fig. 7B). Not all whiskers were equally effective in recruiting Purkinje cell  
357 responses: 23 cells (15%) responded significantly to C3 stimulation, but only 4 (3%) to C1  
358 stimulation. Likewise, pairs of more anterior whiskers had higher chances to be encoded by  
359 the same Purkinje cell (Fig. 7C; Table 5). Thus, also for single whisker stimulation, there was  
360 a balance between sensory integration and specificity.

361 Next, we examined the spatial distribution of responsive Purkinje cells. In Fig. 7D two  
362 nearby recording spots from the same mouse are shown. In recording spot 1, from which the  
363 example in Fig. 7A originates, all Purkinje cells responded to stimulation of at least one  
364 whisker. However, in the second recording spot, only two Purkinje cells responded: both to a  
365 single, but different whisker. For each recording spot we compared responsive vs. non-  
366 responsive Purkinje cells, taking the average + 3 s.d. of the baseline as threshold for

367 responsiveness. This yielded a clear separation for the Purkinje cells in the first, but a rather  
368 poor one in the second recording spot (Fig. 7E). In terms of number of responsive Purkinje  
369 cells and response amplitudes, these two recordings, although made from the same lobule in  
370 the same animal, form relatively extreme examples in our dataset. When plotting the response  
371 strength versus the fraction of responsive Purkinje cells per field of view, we found a positive  
372 correlation (Pearson correlation:  $R = 0.5208$ ;  $p < 0.001$ ; Fig. 7F), implying that Purkinje cells  
373 with stronger responses to a certain whisker tended to be surrounded by other Purkinje cells  
374 encoding the same whisker – in line with the much stronger responses in the first than in the  
375 second recording spot illustrated in Fig. 7D-E. Taken together, stimulating single whiskers  
376 revealed a similar organization as did the less specific stimuli (see Fig. 6) with a clear  
377 tendency of Purkinje cells with the same receptive field to be located close together.  
378 However, the spatial clustering was incomplete and especially weakly responsive Purkinje  
379 cells were found to be interspersed with completely unresponsive Purkinje cells.

380

#### 381 *Functionally equivalent Purkinje cells fire coherently*

382 In addition to spatial clustering, a second requirement for population encoding is coherence of  
383 complex spike firing. As coherence can be affected by anaesthesia, we applied our coherence  
384 analysis on spontaneous and modulation data obtained from Purkinje cells with significant  
385 responses in awake mice. We defined coherence as firing within the same frame of 40 ms,  
386 which still falls well within the subthreshold oscillation cycle of inferior olivary neurons *in*  
387 *vivo* (Khosrovani *et al.*, 2007). Pairs of Purkinje cells with significant responses upon whisker  
388 pad stimulation showed a significantly increased level of coherence ( $p < 0.001$ ; two-  
389 dimensional Kolmogorov-Smirnov test) compared to that of heterogeneous pairs (i.e. pairs of  
390 one responsive and one non-responsive Purkinje cell) (Fig. 8A-B). When we examined the  
391 firing pattern of the same pairs in the absence of sensory stimulation, we found similar results  
392 (Fig. 8C), indicating that it is not the sensory input per se that directs coherence. These  
393 findings were confirmed in the whole population, taking also the other tactile and visual  
394 stimuli into account (Fig. 8D-E). Only stimulation of upper lip, the area least represented  
395 among the recorded Purkinje cells (Fig. 3), revealed less of a discrimination between  
396 significantly responsive and heterogeneous pairs. Hence, we conclude that not only spatial  
397 clustering but also coherence patterning of functionally equivalent Purkinje cells may  
398 facilitate population encoding.



### 399 *Population responses*

400 Although we found increased coherent firing in functionally equivalent Purkinje cells, the  
401 level of coherence was still relatively low, with a regression coefficient seldom exceeding 0.3  
402 (Fig. 8). However, in this analysis we did not discriminate between complex spikes firing in  
403 response to sensory stimulation and complex spikes occurring spontaneously. Therefore, we  
404 subsequently quantified the distribution of complex spikes over time. This is illustrated for a  
405 representative field of view in Fig. 9A. For each frame, we summed all complex spikes of the  
406 17 Purkinje cells in this field of view and subsequently made an aggregate peri-stimulus time  
407 histogram of all these Purkinje cells, whereby we colour-coded the number of complex spike  
408 recorded per frame (see also Romano *et al.* (2018)). The darker the colour, the more complex  
409 spikes occurred simultaneously. Clearly, the darker colours – and thus the stronger coherence  
410 – were observed during the stimulus response period. This occurrence of coherent firing over  
411 time was compared with a random redistribution of the spikes per Purkinje cell (based upon a  
412 Poisson distribution). Note that an equal distribution would imply on average less than two  
413 complex spikes being fired during each frame, indicating the highly patterned distribution  
414 found during the experiments. The grey bars in Fig. 9B indicate the level of coherence that  
415 could be expected by chance, while the red ones indicate highly unlikely values. This shows  
416 that especially the higher levels of coherence are task-related, while spatially isolated firing  
417 occurs irrespective of stimulation.

418 Examination of the aggregate PSTHs confirms what could already be seen in Fig. 3D,  
419 in that there is a trend of reduced inter-trial firing for those stimuli with a relatively strong  
420 response (Fig. 9). In this experiment, we plotted the responses to air puff stimulation, which  
421 recruited statistically significant responses in 17 out of 17 Purkinje cells, on top of those to  
422 lower lip stimulation, which recruited only 1 of the 17 Purkinje cells, illustrating the reduced  
423 baseline firing during air puff stimulation (Fig. 9C). When we calculated the average complex  
424 spike firing for each stimulus condition over the whole population of recorded Purkinje cells,  
425 we found that to be remarkably constant. Even 1 Hz air puff stimulation, able to recruit strong  
426 complex spike responses, did not result in increased complex spike firing as compared to an  
427 epoch without any form of stimulation (Fig. 9D), pointing towards a homeostatic mechanism  
428 within the inferior olive that balances out complex spike firing over longer time intervals.

429

### 430 *Homeostasis of complex spike firing*

431 To further study the impact of complex spike homeostasis, we averaged the PSTHs of all  
432 Purkinje cells with statistically significantly responses to air puff stimulation and compared

433 these to the firing rate in the absence of stimulation (using pseudo-triggers generated at the  
434 same 1 Hz rate). This pair-wise comparison confirmed that the increase in complex spike  
435 firing during the sensory-induced responses comes at the expense of inter-trial firing. The  
436 same was true for the milder whisker pad stimulation. However, because the responses were  
437 weaker, the effect on the inter-trial firing was less than that following strong air puff  
438 stimulation. The homeostatic effect was also observed following visual stimulation, although  
439 this type of stimulation induced an oscillatory response, making the effect less visible (Fig.  
440 10A-B). Taking the whole population into account, thus also the Purkinje cells without a  
441 statistically significant response, there proved to be a correlation between the peak of the  
442 stimulus response and the decrease in inter-trial firing ( $R = 0.400$ ;  $p = 0.001$  and  $R = 0.314$ ;  $p$   
443  $= 0.001$ ; Pearson correlations for air puff and whisker pad stimulation, respectively; Fig.  
444 10C). Only following visual stimulation, this correlation was less obvious ( $R = 0.201$ ;  $p =$   
445  $0.201$ ; Pearson correlation after Benjamin-Hochberg correction), possibly due to the  
446 oscillatory responses evoked by visual stimulation.

## 447 **Discussion**

448

449 Complex spike firing may appear notoriously unpredictable as its spontaneous frequency is  
450 low, yet sustained, and its response rate is at best moderate, with large jitters and an  
451 ambiguous relation to stimulus strength. This raises the question as to how the inferior olive  
452 relays its signals over time. Possibly, coherent complex spike firing by neighbouring Purkinje  
453 cells might jointly represent a stimulus, together covering the required signalling for a  
454 particular temporal domain (Sasaki *et al.*, 1989; Lang *et al.*, 1999; Sugihara *et al.*, 2007;  
455 Ozden *et al.*, 2009; Schultz *et al.*, 2009). Furthermore, the spatial relation between  
456 somatotopic patches and parasagittally oriented microzones has not been clarified in terms of  
457 complex spike signalling, and it is not understood to what extent this relation also depends on  
458 the temporal context in which the signals are generated.

459 Here, we investigated at the level of individual Purkinje cells whether encoding of  
460 somatosensory input from different facial areas in lobule crus 1 occurs in striped microzones  
461 or instead follows a more fractured arrangement. Mild touches at localized facial areas  
462 revealed a loose version of fractured somatotopy. Purkinje cells with the same receptive field  
463 tended to be located in each other's neighbourhood, but the spatial organization was not very  
464 strict, as highly responsive Purkinje cells were sometimes observed amidst non-responsive  
465 ones. The functionally equivalent, adjacent Purkinje cells showed increased coherence in their  
466 complex spike firing, in particular in response to sensory stimulation. Homeostatic  
467 mechanisms are engaged, ensuring that over longer periods complex spike firing rates are  
468 constant, making the short-lived coherent responses more salient.

469

### 470 *The functional role of climbing fibre activity*

471 Clinical manifestations of inferior olivary dysfunction range from ataxia and tremor to autism  
472 spectrum disorders (Llinás *et al.*, 1975; Samuel *et al.*, 2004; Bauman & Kemper, 2005; Welsh  
473 *et al.*, 2005; Lim & Lim, 2009; De Gruijl *et al.*, 2013). Climbing fibre-evoked complex spikes  
474 are also essential for the proper timing, size and direction of movements as well as for the  
475 encoding of expected and unexpected deviations from planned movements (Wang *et al.*,  
476 1987; Simpson *et al.*, 1996; Kitazawa *et al.*, 1998; Ito, 2013; Yang & Lisberger, 2014;  
477 Herzfeld *et al.*, 2018). In addition, climbing fibre activity is crucial for cerebellar learning by  
478 controlling synaptic plasticity at a wide variety of synapses in the molecular layer of the  
479 cerebellar cortex (Ito & Kano, 1982; Ito, 2003; Coesmans *et al.*, 2004; Gao *et al.*, 2012).

480 Despite these many functions, complex spike firing is remarkably stable over longer intervals,  
481 suggesting that the impact of complex spikes is strongly context-dependent.

482 This context is provided by the synaptic inputs to the inferior olive that relay  
483 information from excitatory ascending and descending pathways as well as inhibitory  
484 projections from the hindbrain (De Zeeuw *et al.*, 1998). Both types converge on each  
485 individual spine present on the dendrites of the inferior olivary neurons (De Zeeuw *et al.*,  
486 1989; De Zeeuw *et al.*, 1990). The inhibitory input comes predominantly from the cerebellar  
487 nuclei, implying that part of the context is mediated by one of the target regions of the  
488 climbing fibres themselves. This feedback is engaged in a closed loop, as individual climbing  
489 fibres of each olivary subnucleus project to the Purkinje cells located within a specific  
490 parasagittal zone (Sugihara *et al.*, 2001) that converge on the neurons in the cerebellar nuclei  
491 that project back to the same olivary subnucleus where the loop started (Groenewegen *et al.*,  
492 1979; Voogd & Glickstein, 1998; Apps *et al.*, 2018). Each module can be further subdivided  
493 into microzones within which complex spike coherence is clearly enhanced upon strong  
494 stimulation (Ozden *et al.*, 2009; Tsutsumi *et al.*, 2015), a phenomenon that is enhanced by  
495 strong electrotonic coupling within olivary glomeruli (Sotelo *et al.*, 1974; Ruigrok *et al.*,  
496 1990; Devor & Yarom, 2002; De Gruijl *et al.*, 2014). Strong stimuli can also increase the  
497 coherence of Purkinje cells in adjacent bands (Tsutsumi *et al.*, 2015) while our present data  
498 show that weak stimuli can trigger responses of loosely grouped cells not encompassing a full  
499 microzone. Thus, although anatomical and functional data support the microzonal  
500 organization, the activity patterns are best understood as produced dynamically depending on  
501 the behavioural context that is transmitted via cerebellar and extra-cerebellar synaptic input.

502

### 503 *Receptive fields of Purkinje cells and population coding*

504 Several existing maps of somatosensory representations of complex spike activity suggest a  
505 fractured somatotopy (Miles & Wiesendanger, 1975; Rushmer *et al.*, 1980; Castelfranco *et*  
506 *al.*, 1994). These maps were typically created by establishing, for each recording position, the  
507 strongest input region, disregarding information on convergence of multiple inputs. These  
508 studies made clear, however, that climbing fibres could have receptive fields of widely  
509 different sizes, expanding to structures as large as a whole limb (Thach, 1967). Part of this can  
510 be explained by the sagittally fanning climbing projections onto multiple lobules (Sugihara *et*  
511 *al.*, 2001). Here we show with cellular resolution within cerebellar microzones that climbing  
512 fibres indeed do convey somatosensory input from different areas, with Purkinje cells having  
513 the same receptive fields being located preferably in each other's proximity.

514 Our data confirm that increasing stimulus strength promotes complex spike responses,  
515 but its impact might be lower than predicted by other studies (Eccles *et al.*, 1972; Bosman *et*  
516 *al.*, 2010; Najafi *et al.*, 2014), showing again the relevance of the behavioural and historical  
517 context for complex spike firing. More salient than the stimulus strength might be the  
518 combination of sensory inputs, in line with the trend of their convergence on single Purkinje  
519 cells. Analysing the response rates of Purkinje cell ensembles revealed that the density of  
520 responsive cells is crucial for shaping the population response. We propose that the weak  
521 spatial clustering of Purkinje cells encoding the same stimulus, being interspersed with  
522 Purkinje cells receiving input from other sources, and the tendency of coherent firing of  
523 Purkinje cells encoding the same stimulus both contribute to the creation of a heterogeneous  
524 map of Purkinje cells, where each area encodes a particular functional set of inputs. Each of  
525 the properties of the complex spikes seems rather insignificant in isolation, but in combination  
526 may result in specific and robust population encoding.

527

#### 528 *Non-tactile inputs*

529 Light or sound can act as conditional stimulus to recruit increasingly more climbing fibre  
530 activity during learning, highlighting the flexibility of this pathway (Ohmae & Medina, 2015;  
531 Ten Brinke *et al.*, 2015). We show here that, also in naïve animals, visual and auditory input  
532 can converge on the same Purkinje cells that encode somatosensory input, further  
533 strengthening the notion that climbing fibre activity can act as an integrator of contextual  
534 input. With visual stimulation the latency was significantly longer than expected. Probably,  
535 the presented visual stimulus is not directly relayed from the retina, but a descending input  
536 from the visual cortex or other higher brain regions such as the mesodiencephalic junction  
537 (De Zeeuw *et al.*, 1998).

538

#### 539 *Homeostasis of complex spike frequency*

540 The overall firing rate of complex spikes was stable across conditions, with response peaks  
541 being compensated by reduced inter-trial firing (see also Warnaar *et al.* (2018)). The stronger  
542 the response peak, the less inter-trial firing, leading to homeostasis of complex spike firing  
543 over longer time periods. Intriguingly, the complex spikes during the inter-trial intervals were  
544 predominantly fired by a few, dispersed Purkinje cells and the response peak was largely due  
545 to increased coherence. It seems therefore that Purkinje cells display a basic complex spike  
546 firing rate, which in the absence of functional behaviour is not coherent with adjacent  
547 Purkinje cells. In view of the strong impact of complex spikes on synaptic plasticity (Ito &

548 Kano, 1982; Ito, 2003; Coesmans *et al.*, 2004; Gao *et al.*, 2012), this could subserve  
549 homeostatic functions. Salient stimuli are largely encoded by coherent firing, making them  
550 different from non-stimulus related activity.

551         Several mechanisms may contribute to the homeostatic control of inferior olivary  
552 spiking, including the previously mentioned olivo-cerebellar loops. Disrupted Purkinje cell  
553 activity can affect climbing fibre activity (Chen *et al.*, 2010) and reduced inferior olivary  
554 activity leads to enhanced simple spike activity (Montarolo *et al.*, 1982), which in turn  
555 dampens activity in the GABAergic neurons of the cerebellar nuclei that controls the inferior  
556 olive (Chaumont *et al.*, 2013; Witter *et al.*, 2013). The interplay between glutamatergic input  
557 to the neurons of the inferior olive, intracellular signalling and electrotonic coupling may also  
558 lead to homeostatic control of complex spike firing via PKA and  $\beta$ CaMKII (Mathy *et al.*,  
559 2014; Bazzigaluppi *et al.*, 2017). Overall, the inferior olive functions at the cross road of well-  
560 defined and rigid anatomical structures and highly dynamic synaptic input, while subject to  
561 homeostatic control, the sources of which still are partly to be determined.

562 **References**

563

564 **References**

565 Albus JS. (1971). Theory of cerebellar function. *Math Biosci* **10**, 25-61.

566

567 Andersen P, Eccles JC & Voorhoeve PE. (1964). Postsynaptic inhibition of cerebellar  
568 Purkinje cells. *J Neurophysiol* **27**, 1138-1153.

569

570 Apps R & Garwicz M. (2005). Anatomical and physiological foundations of cerebellar  
571 information processing. *Nat Rev Neurosci* **6**, 297-311.

572

573 Apps R & Hawkes R. (2009). Cerebellar cortical organization: a one-map hypothesis. *Nat Rev*  
574 *Neurosci* **10**, 670-681.

575

576 Apps R, Hawkes R, Aoki S, Bengtsson F, Brown AM, Chen G, Ebner TJ, Isope P, Jorntell H,  
577 Lackey EP, Lawrenson C, Lumb B, Schonewille M, Sillitoe RV, Spaeth L, Sugihara I,  
578 Valera A, Voogd J, Wylie DR & Ruigrok TJH. (2018). Cerebellar modules and their  
579 role as operational cerebellar processing units. *Cerebellum*.

580

581 Arabzadeh E, Panzeri S & Diamond ME. (2004). Whisker vibration information carried by rat  
582 barrel cortex neurons. *J Neurosci* **24**, 6011-6020.

583

584 Axelrad H & Crepel F. (1977). Représentation sélective des vibrisses mystaciales au niveau  
585 des cellules de Purkinje du cervelet par la voie des fibres grimpantes chez le rat. *C R*  
586 *Acad Sci Hebd Seances Acad Sci D* **284**, 1321-1324.

587

588 Bauman ML & Kemper TL. (2005). Neuroanatomic observations of the brain in autism: a  
589 review and future directions. *Int J Dev Neurosci* **23**, 183-187.

590

591 Bazzigaluppi P, Isenia SC, Haasdijk ED, Elgersma Y, De Zeeuw CI, van der Giessen RS & de  
592 Jeu MTG. (2017). Modulation of murine olivary connexin 36 gap Junctions by PKA  
593 and CaMKII. *Front Cell Neurosci* **11**, 397.

594

595 Bloedel JR & Ebner TJ. (1984). Rhythmic discharge of climbing fibre afferents in response to  
596 natural peripheral stimuli in the cat. *J Physiol* **352**, 129-146.

597

598 Bosman LWJ, Houweling AR, Owens CB, Tanke N, Shevchouk OT, Rahmati N, Teunissen  
599 WHT, Ju C, Gong W, Koekkoek SKE & De Zeeuw CI. (2011). Anatomical pathways  
600 involved in generating and sensing rhythmic whisker movements. *Front Integr*  
601 *Neurosci* **5**, 53.

602

- 603 Bosman LWJ, Koekkoek SKE, Shapiro J, Rijken BFM, Zandstra F, van der Ende B, Owens  
604 CB, Potters JW, de Gruijl JR, Ruigrok TJH & De Zeeuw CI. (2010). Encoding of  
605 whisker input by cerebellar Purkinje cells. *J Physiol* **588**, 3757-3783.
- 606
- 607 Brown IE & Bower JM. (2002). The influence of somatosensory cortex on climbing fiber  
608 responses in the lateral hemispheres of the rat cerebellum after peripheral tactile  
609 stimulation. *J Neurosci* **22**, 6819-6829.
- 610
- 611 Castelfranco AM, Robertson LT & McCollum G. (1994). Detail, proportion, and foci among  
612 face receptive fields of climbing fiber responses in the cat cerebellum. *Somatosens*  
613 *Mot Res* **11**, 27-46.
- 614
- 615 Cerminara NL, Lang EJ, Sillitoe RV & Apps R. (2015). Redefining the cerebellar cortex as an  
616 assembly of non-uniform Purkinje cell microcircuits. *Nat Rev Neurosci* **16**, 79-93.
- 617
- 618 Chaplan SR, Bach FW, Pogrel JW, Chung JM & Yaksh TL. (1994). Quantitative assessment  
619 of tactile allodynia in the rat paw. *J Neurosci Methods* **53**, 55-63.
- 620
- 621 Chaumont J, Guyon N, Valera AM, Dugué GP, Popa D, Marcaggi P, Gautheron V, Reibel-  
622 Foisset S, Dieudonné S, Stephan A, Barrot M, Cassel JC, Dupont JL, Doussau F,  
623 Poulain B, Selimi F, Léna C & Isope P. (2013). Clusters of cerebellar Purkinje cells  
624 control their afferent climbing fiber discharge. *Proc Natl Acad Sci U S A* **110**, 16223-  
625 16228.
- 626
- 627 Chen X, Kovalchuk Y, Adelsberger H, Henning HA, Sausbier M, Wietzorrek G, Ruth P,  
628 Yarom Y & Konnerth A. (2010). Disruption of the olivo-cerebellar circuit by Purkinje  
629 neuron-specific ablation of BK channels. *Proc Natl Acad Sci U S A* **107**, 12323-12328.
- 630
- 631 Coesmans M, Weber JT, De Zeeuw CI & Hansel C. (2004). Bidirectional parallel fiber  
632 plasticity in the cerebellum under climbing fiber control. *Neuron* **44**, 691-700.
- 633
- 634 De Gruijl JR, Bosman LWJ, De Zeeuw CI & De Jeu MTG. (2013). Inferior olive: All ins and  
635 outs. In *Handbook of the Cerebellum and Cerebellar Disorders*, ed. Manto M,  
636 Schmahmann JD, Rossi F, Gruol DL & Koibuchi N, pp. 1013-1058. Springer  
637 Netherlands, Dordrecht.
- 638
- 639 De Gruijl JR, Hoogland TM & De Zeeuw CI. (2014). Behavioral correlates of complex spike  
640 synchrony in cerebellar microzones. *J Neurosci* **34**, 8937-8944.
- 641
- 642 De Zeeuw CI, Hoebeek FE, Bosman LWJ, Schonewille M, Witter L & Koekkoek SK. (2011).  
643 Spatiotemporal firing patterns in the cerebellum. *Nat Rev Neurosci* **12**, 327-344.

644



- 645 De Zeeuw CI, Holstege JC, Ruigrok TJ & Voogd J. (1989). Ultrastructural study of the  
646 GABAergic, cerebellar, and mesodiencephalic innervation of the cat medial accessory  
647 olive: anterograde tracing combined with immunocytochemistry. *J Comp Neurol* **284**,  
648 12-35.
- 649  
650 De Zeeuw CI, Holstege JC, Ruigrok TJH & Voogd J. (1990). Mesodiencephalic and  
651 cerebellar terminals terminate upon the same dendritic spines in the glomeruli of the  
652 cat and rat inferior olive: an ultrastructural study using a combination of [3H]leucine  
653 and wheat germ agglutinin coupled horseradish peroxidase anterograde tracing.  
654 *Neuroscience* **34**, 645-655.
- 655  
656 De Zeeuw CI, Simpson JI, Hoogenraad CC, Galjart N, Koekkoek SKE & Ruigrok TJH.  
657 (1998). Microcircuitry and function of the inferior olive. *Trends Neurosci* **21**, 391-400.
- 658  
659 De Zeeuw CI & Ten Brinke MM. (2015). Motor learning and the cerebellum. *Cold Spring*  
660 *Harb Perspect Biol* **7**, a021683.
- 661  
662 Devor A & Yarom Y. (2002). Electrotonic coupling in the inferior olivary nucleus revealed  
663 by simultaneous double patch recordings. *J Neurophysiol* **87**, 3048-3058.
- 664  
665 Eccles JC, Sabah NH, Schmidt RF & Táboríková H. (1972). Cutaneous mechanoreceptors  
666 influencing impulse discharges in cerebellar cortex. III. In Purkyně cells by climbing  
667 fiber input. *Exp Brain Res* **15**, 484-497.
- 668  
669 Ekerot CF, Garwicz M & Schouenborg J. (1991). Topography and nociceptive receptive  
670 fields of climbing fibres projecting to the cerebellar anterior lobe in the cat. *J Physiol*  
671 **441**, 257-274.
- 672  
673 Gao W, Chen G, Reinert KC & Ebner TJ. (2006). Cerebellar cortical molecular layer  
674 inhibition is organized in parasagittal zones. *J Neurosci* **26**, 8377-8387.
- 675  
676 Gao Z, Van Beugen BJ & De Zeeuw CI. (2012). Distributed synergistic plasticity and  
677 cerebellar learning. *Nat Rev Neurosci* **13**, 619-635.
- 678  
679 Gibson AR, Horn KM & Pong M. (2004). Activation of climbing fibers. *Cerebellum* **3**, 212-  
680 221.
- 681  
682 Groenewegen HJ, Voogd J & Freedman SL. (1979). The parasagittal zonation within the  
683 olivocerebellar projection. II. Climbing fiber distribution in the intermediate and  
684 hemispheric parts of cat cerebellum. *J Comp Neurol* **183**, 551-601.
- 685

- 686 Harvey RJ & Napper RMA. (1991). Quantitative studies on the mammalian cerebellum. *Prog*  
687 *Neurobiol* **36**, 437-463.
- 688  
689 Herzfeld DJ, Kojima Y, Soetedjo R & Shadmehr R. (2018). Encoding of error and learning to  
690 correct that error by the Purkinje cells of the cerebellum. *Nat Neurosci* **21**, 736-743.
- 691  
692 Hoogland TM, De Gruijl JR, Witter L, Canto CB & De Zeeuw CI. (2015). Role of  
693 synchronous activation of cerebellar Purkinje cell ensembles in multi-joint movement  
694 control. *Curr Biol* **25**, 1157-1165.
- 695  
696 Ito M. (2003). Long-term depression. *Annu Rev Neurosci* **12**, 85-102.
- 697  
698 Ito M. (2013). Error detection and representation in the olivo-cerebellar system. *Front Neural*  
699 *Circuits* **7**, 1.
- 700  
701 Ito M & Kano M. (1982). Long-lasting depression of parallel fiber-Purkinje cell transmission  
702 induced by conjunctive stimulation of parallel fibers and climbing fibers in the  
703 cerebellar cortex. *Neurosci Lett* **33**, 253-258.
- 704  
705 Junker M, Endres D, Sun ZP, Dicke PW, Giese M & Thier P. (2018). Learning from the past:  
706 A reverberation of past errors in the cerebellar climbing fiber signal. *PLoS Biol* **16**,  
707 e2004344.
- 708  
709 Khosrovani S, Van Der Giessen RS, De Zeeuw CI & De Jeu MTG. (2007). *In vivo* mouse  
710 inferior olive neurons exhibit heterogeneous subthreshold oscillations and spiking  
711 patterns. *Proc Natl Acad Sci U S A* **104**, 15911-15916.
- 712  
713 Kitazawa S, Kimura T & Yin PB. (1998). Cerebellar complex spikes encode both destinations  
714 and errors in arm movements. *Nature* **392**, 494-497.
- 715  
716 Kubo R, Aiba A & Hashimoto K. (2018). The anatomical pathway from the mesodiencephalic  
717 junction to the inferior olive relays perioral sensory signals to the cerebellum in the  
718 mouse. *J Physiol*.
- 719  
720 Lang EJ, Sugihara I, Welsh JP & Llinás R. (1999). Patterns of spontaneous purkinje cell  
721 complex spike activity in the awake rat. *J Neurosci* **19**, 2728-2739.
- 722  
723 Lim CCT & Lim SA. (2009). Pendular nystagmus and palatomyoclonus from hypertrophic  
724 olivary degeneration. *New Engl J Med* **360**, e12.
- 725  
726 Llinás R, Walton K, Hillman DE & Sotelo C. (1975). Inferior olive: its role in motor learning.  
727 *Science* **190**, 1230-1231.

- 728  
729 Mathy A, Clark BA & Häusser M. (2014). Synaptically induced long-term modulation of  
730 electrical coupling in the inferior olive. *Neuron* **81**, 1290-1296.
- 731  
732 Miles TS & Wiesendanger M. (1975). Organization of climbing fibre projections to the  
733 cerebellar cortex from trigeminal cutaneous afferents and from the SI face area of the  
734 cerebral cortex in the cat. *J Physiol* **245**, 409-424.
- 735  
736 Montarolo PG, Palestini M & Strata P. (1982). The inhibitory effect of the olivocerebellar  
737 input on the cerebellar Purkinje cells in the rat. *J Physiol* **332**, 187-202.
- 738  
739 Mukamel EA, Nimmerjahn A & Schnitzer MJ. (2009). Automated analysis of cellular signals  
740 from large-scale calcium imaging data. *Neuron* **63**, 747-760.
- 741  
742 Najafi F, Giovannucci A, Wang SSH & Medina JF. (2014). Coding of stimulus strength via  
743 analog calcium signals in Purkinje cell dendrites of awake mice. *eLIFE* **3**, e03663.
- 744  
745 Najafi F & Medina JF. (2013). Beyond "all-or-nothing" climbing fibers: graded representation  
746 of teaching signals in Purkinje cells. *Front Neural Circuits* **7**, 115.
- 747  
748 Ohmae S & Medina JF. (2015). Climbing fibers encode a temporal-difference prediction error  
749 during cerebellar learning in mice. *Nat Neurosci* **18**, 1798-1803.
- 750  
751 Oscarsson O. (1969). Termination and functional organization of the dorsal spino-  
752 olivocerebellar path. *J Physiol* **200**, 129-149.
- 753  
754 Ozden I, Dombeck DA, Hoogland TM, Tank DW & Wang SS. (2012). Widespread state-  
755 dependent shifts in cerebellar activity in locomoting mice. *PLoS One* **7**, e42650.
- 756  
757 Ozden I, Lee HM, Sullivan MR & Wang SSH. (2008). Identification and clustering of event  
758 patterns from in vivo multiphoton optical recordings of neuronal ensembles. *J*  
759 *Neurophysiol* **100**, 495-503.
- 760  
761 Ozden I, Sullivan MR, Lee HM & Wang SSH. (2009). Reliable coding emerges from  
762 coactivation of climbing fibers in microbands of cerebellar Purkinje neurons. *J*  
763 *Neurosci* **29**, 10463-10473.
- 764  
765 Person AL & Raman IM. (2011). Purkinje neuron synchrony elicits time-locked spiking in the  
766 cerebellar nuclei. *Nature* **481**, 502-505.
- 767  
768 Romano V, De Propriis L, Bosman LWJ, Warnaar P, Ten Brinke MM, Lindeman S, Ju C,  
769 Velauthapillai A, Spanke JK, Middendorp Guerra E, Hoogland TM, Negrello M,

- 770 D'Angelo E & De Zeeuw CI. (2018). Potentiation of cerebellar Purkinje cells  
771 facilitates whisker reflex adaptation through increased simple spike activity. *bioRxiv*,  
772 335489.
- 773  
774 Ruigrok TJH. (2011). Ins and outs of cerebellar modules. *Cerebellum* **10**, 464-474.
- 775  
776 Ruigrok TJH, de Zeeuw CI, van der Burg J & Voogd J. (1990). Intracellular labeling of  
777 neurons in the medial accessory olive of the cat: I. Physiology and light microscopy. *J*  
778 *Comp Neurol* **300**, 462-477.
- 779  
780 Rushmer DS, Woollacott MH, Robertson LT & Laxer KD. (1980). Somatotopic organization  
781 of climbing fiber projections from low threshold cutaneous afferents to pars  
782 intermedia of cerebellar cortex in the cat. *Brain Res* **181**, 17-30.
- 783  
784 Samuel M, Torun N, Tuite PJ, Sharpe JA & Lang AE. (2004). Progressive ataxia and palatal  
785 tremor (PAPT): clinical and MRI assessment with review of palatal tremors. *Brain*  
786 **127**, 1252-1268.
- 787  
788 Sasaki K, Bower JM & Llinás R. (1989). Multiple Purkinje cell recording in rodent cerebellar  
789 cortex. *Eur J Neurosci* **1**, 572-586.
- 790  
791 Schultz SR, Kitamura K, Post-Uiterweer A, Krupic J & Häusser M. (2009). Spatial pattern  
792 coding of sensory information by climbing fiber-evoked calcium signals in networks  
793 of neighboring cerebellar Purkinje cells. *J Neurosci* **29**, 8005-8015.
- 794  
795 Shambes GM, Gibson JM & Welker W. (1978). Fractured somatotopy in granule cell tactile  
796 areas of rat cerebellar hemispheres revealed by micromapping. *Brain Behav Evol* **15**,  
797 94-140.
- 798  
799 Simpson JI, Wylie DR & De Zeeuw CI. (1996). On climbing fiber signals and their  
800 consequence(s). *Behav Brain Sci* **19**, 384-398.
- 801  
802 Sotelo C, Llinás R & Baker R. (1974). Structural study of inferior olivary nucleus of the cat:  
803 morphological correlates of electrotonic coupling. *J Neurophysiol* **37**, 541-559.
- 804  
805 Stosiek C, Garaschuk O, Holthoff K & Konnerth A. (2003). *In vivo* two-photon calcium  
806 imaging of neuronal networks. *Proc Natl Acad Sci U S A* **100**, 7319-7324.
- 807  
808 Streng ML, Popa LS & Ebner TJ. (2017). Climbing fibers control Purkinje cell  
809 representations of behavior. *J Neurosci* **37**, 1997-2009.
- 810

- 811 Sugihara I, Fujita H, Na J, Quy PN, Li BY & Ikeda D. (2009). Projection of reconstructed  
812 single Purkinje cell axons in relation to the cortical and nuclear aldolase C  
813 compartments of the rat cerebellum. *J Comp Neurol* **512**, 282-304.
- 814
- 815 Sugihara I, Marshall SP & Lang EJ. (2007). Relationship of complex spike synchrony bands  
816 and climbing fiber projection determined by reference to aldolase C compartments in  
817 crus IIa of the rat cerebellar cortex. *J Comp Neurol* **501**, 13-29.
- 818
- 819 Sugihara I, Wu H & Shinoda Y. (1999). Morphology of single olivocerebellar axons labeled  
820 with biotinylated dextran amine in the rat. *J Comp Neurol* **414**, 131-148.
- 821
- 822 Sugihara I, Wu HS & Shinoda Y. (2001). The entire trajectories of single olivocerebellar  
823 axons in the cerebellar cortex and their contribution to cerebellar  
824 compartmentalization. *J Neurosci* **21**, 7715-7723.
- 825
- 826 Sullivan MR, Nimmerjahn A, Sarkisov DV, Helmchen F & Wang SSH. (2005). In vivo  
827 calcium imaging of circuit activity in cerebellar cortex. *J Neurophysiol* **94**, 1636-1644.
- 828
- 829 Suvrathan A, Payne HL & Raymond JL. (2016). Timing rules for synaptic plasticity matched  
830 to behavioral function. *Neuron* **92**, 959-967.
- 831
- 832 Szentágothai J. (1965). The use of degeneration methods in the investigation of short neuronal  
833 connexions. *Prog Brain Res* **14**, 1-32.
- 834
- 835 Tada M, Takeuchi A, Hashizume M, Kitamura K & Kano M. (2014). A highly sensitive  
836 fluorescent indicator dye for calcium imaging of neural activity *in vitro* and *in vivo*.  
837 *Eur J Neurosci* **39**, 1720-1728.
- 838
- 839 Ten Brinke MM, Boele HJ, Spanke JK, Potters JW, Kornysheva K, Wulff P, Ijpelaar ACHG,  
840 Koekkoek SKE & De Zeeuw CI. (2015). Evolving models of Pavlovian conditioning:  
841 cerebellar cortical dynamics in awake behaving mice. *Cell Rep* **13**, 1977-1988.
- 842
- 843 Thach WT, Jr. (1967). Somatosensory receptive fields of single units in cat cerebellar cortex.  
844 *J Neurophysiol* **30**, 675-696.
- 845
- 846 Tsutsumi S, Yamazaki M, Miyazaki T, Watanabe M, Sakimura K, Kano M & Kitamura K.  
847 (2015). Structure-function relationships between aldolase C/zebrin II expression and  
848 complex spike synchrony in the cerebellum. *J Neurosci* **35**, 843-852.
- 849
- 850 Voogd J & Glickstein M. (1998). The anatomy of the cerebellum. *Trends Neurosci* **21**, 370-  
851 375.
- 852

- 853 Wang JJ, Kim JH & Ebner TJ. (1987). Climbing fiber afferent modulation during a visually  
854 guided, multi-joint arm movement in the monkey. *Brain Res* **410**, 323-329.
- 855  
856 Warnaar P, Negrello M, Romano V, Owens CB, Lindeman S, Iavarona E, Spanke JK,  
857 Bosman LWJ & De Zeeuw CI. (2018). Aperiodic rhythms of the inferior olive.  
858 *bioRxiv*, 408112.
- 859  
860 Welsh JP, Ahn ES & Placantonakis DG. (2005). Is autism due to brain desynchronization? *Int*  
861 *J Dev Neurosci* **23**, 253-263.
- 862  
863 Welsh JP, Lang EJ, Suglhara I & Llinas R. (1995). Dynamic organization of motor control  
864 within the olivocerebellar system. *Nature* **374**, 453-457.
- 865  
866 Witter L, Canto CB, Hoogland TM, de Gruijl JR & De Zeeuw CI. (2013). Strength and timing  
867 of motor responses mediated by rebound firing in the cerebellar nuclei after Purkinje  
868 cell activation. *Front Neural Circuits* **7**, 133.
- 869  
870 Xiao J, Cerminara NL, Kotsurovskyy Y, Aoki H, Burroughs A, Wise AK, Luo Y, Marshall  
871 SP, Sugihara I, Apps R & Lang EJ. (2014). Systematic regional variations in Purkinje  
872 cell spiking patterns. *PLoS One* **9**, e105633.
- 873  
874 Yang Y & Lisberger SG. (2014). Purkinje-cell plasticity and cerebellar motor learning are  
875 graded by complex-spike duration. *Nature* **510**, 529-532.
- 876  
877 Yatim N, Billig I, Compoin C, Buisseret P & Buisseret-Delmas C. (1996).  
878 Trigemino-cerebellar and trigemino-olivary projections in rats. *Neurosci Res* **25**, 267-  
879 283.
- 880  
881 Zhou H, Lin Z, Voges K, Ju C, Gao Z, Bosman LWJ, Ruigrok TJH, Hoebeek FE, De Zeeuw  
882 CI & Schonewille M. (2014). Cerebellar modules operate at different frequencies.  
883 *eLIFE* **3**, e02536.
- 884  
885  
886  
887

888 **Additional information**

889

890 *Competing interests*

891 The authors declare that there are no competing interests.

892

893 *Author contributions*

894 All experiments were performed at the Department of Neuroscience of the Erasmus MC,  
895 Rotterdam, The Netherlands. The experiments were designed by C.J., L.W.J.B., T.M.H.,  
896 P.M., M.N. and C.I.D.Z., performed by C.J. and P.M. and analysed by all authors. The  
897 manuscript was written by C.J., L.W.J.B., T.M.H., M.N. and C.I.D.Z. with contributions from  
898 all authors. All authors have approved the final version of the manuscript and ensure the  
899 accuracy and integrity of the data presented. All persons with a significant contribution to this  
900 study are listed as authors.

901

902 *Funding*

903 Financial support was provided by the Netherlands Organization for Scientific Research  
904 (NWO-ALW; C.I.D.Z.), the Dutch Organization for Medical Sciences (ZonMW; C.I.D.Z.),  
905 Life Sciences (C.I.D.Z.), ERC-adv and ERC-POC (C.I.D.Z.) and the China Scholarship  
906 Council (No. 2010623033; C.J.). The funders had no role in study design, data collection and  
907 analysis, decision to publish, or preparation of the manuscript.

908

909 *Acknowledgements*

910 The authors wish to thank A.C.H.G. IJpelaar for technical assistance and Dr. M. Schonewille  
911 for help with recording ocular movements during stimulation.

912 **Tables**

913 **Table 1**

| Stimulation | Responsive cells |    | Response parameters |              | Prevalence ( $p$ ) |              |              |              |              |
|-------------|------------------|----|---------------------|--------------|--------------------|--------------|--------------|--------------|--------------|
|             | No.              | %  | Peak (Hz)           | Latency (ms) | UL                 | LL           | Ch           | SO           | LED          |
| Whisker pad | 111 (282)        | 39 | 2.12 ± 0.82         | 84±42        | <b>0.010</b>       | 0.661        | <b>0.003</b> | <b>0.000</b> | 0.828        |
| Upper lip   | 71 (249)         | 29 | 1.89 ± 0.67         | 84±84        |                    | <b>0.031</b> | 0.597        | 0.157        | 0.064        |
| Lower lip   | 99 (264)         | 38 | 2.23 ± 0.97         | 84±42        |                    |              | <b>0.010</b> | <b>0.001</b> | 1.000        |
| Cheek       | 53 (203)         | 26 | 2.30 ± 1.67         | 84±42        |                    |              |              | 0.415        | <b>0.028</b> |
| Sound only  | 44 (197)         | 22 | 1.74 ± 0.65         | 84±84        |                    |              |              |              | <b>0.003</b> |
| LED         | 49 (129)         | 34 | 2.13 ± 1.18         | 126±0        |                    |              |              |              |              |

914

915 **Table 1 – Purkinje cell responses to sensory stimulation in awake mice**

916 Purkinje cells respond with complex firing to sensory stimulation (Fig. 3). For each type of  
 917 stimulation, the number and percentage of statistically significantly responsive cells (peak  
 918 response > average + 3 s.d. of baseline firing) is indicated (in brackets: total number of cells  
 919 tested). The response peak and response latency are indicated as medians ± inter-quartile  
 920 ranges. The relative prevalence of responses was not equal for all stimulus types, as  
 921 confirmed by a 6x2  $\chi^2$  test. Differences in relative prevalence were tested using pair-wise  
 922 Fisher's exact tests (as the  $\chi^2$  test was significant, no further correction for multiple  
 923 comparisons was applied). Bold values indicate significantly different prevalences. UL =  
 924 upper lip; LL = lower lip; CH = cheek; SO = sound only.



925 **Table 2**

| Stimulation | Pearson correlation (R) |       |       |       |       | Significance of Pearson correlation ( <i>p</i> ) |                  |                  |                  |                  |
|-------------|-------------------------|-------|-------|-------|-------|--------------------------------------------------|------------------|------------------|------------------|------------------|
|             | UL                      | LL    | Ch    | SO    | LED   | UL                                               | LL               | Ch               | SO               | LED              |
| Whisker pad | 0.272                   | 0.253 | 0.166 | 0.257 | 0.358 | <b>&lt;0.001</b>                                 | <b>&lt;0.001</b> | <b>0.018</b>     | <b>0.001</b>     | <b>&lt;0.001</b> |
| Upper lip   |                         | 0.192 | 0.189 | 0.130 | 0.129 |                                                  | <b>0.002</b>     | <b>0.001</b>     | 0.126            | 0.179            |
| Lower lip   |                         |       | 0.387 | 0.513 | 0.339 |                                                  |                  | <b>&lt;0.001</b> | <b>&lt;0.001</b> | <b>&lt;0.001</b> |
| Cheek       |                         |       |       | 0.485 | 0.362 |                                                  |                  |                  | <b>&lt;0.001</b> | <b>&lt;0.001</b> |
| Sound only  |                         |       |       |       | 0.523 |                                                  |                  |                  |                  | <b>&lt;0.001</b> |

926

927 **Table 2 – Correlations between response probabilities**

928 For each Purkinje cell, we made pair-wise correlations of the Z scores of the amplitudes of the  
 929 responses to different stimuli. The Pearson correlation coefficient (R) and the accompanying *p*  
 930 value are indicated in this Table. The *p* values indicated in bold reflect significant values  
 931 (after Benajmini-Hochberg correction for multiple comparisons). These data are graphically  
 932 represented in Fig. 4A. WP = whisker pad; UL = upper lip; LL = lower lip; Ch = cheek; SO =  
 933 sound only.

934

935 **Table 3**

| Stimulation | Rate of occurrence (Z) |      |             |             |             | Chance of occurrence ( <i>p</i> ) |       |              |              |              |
|-------------|------------------------|------|-------------|-------------|-------------|-----------------------------------|-------|--------------|--------------|--------------|
|             | UL                     | LL   | Ch          | SO          | LED         | UL                                | LL    | Ch           | SO           | LED          |
| Whisker pad | 1.21                   | 1.25 | 0.85        | 1.34        | <b>2.75</b> | 0.225                             | 0.213 | 0.394        | 0.181        | <b>0.006</b> |
| Upper lip   |                        | 1.23 | <b>2.00</b> | 1.34        | 1.94        |                                   | 0.220 | <b>0.045</b> | 0.181        | 0.052        |
| Lower lip   |                        |      | <b>2.39</b> | <b>2.70</b> | <b>2.62</b> |                                   |       | <b>0.017</b> | <b>0.007</b> | <b>0.009</b> |
| Cheek       |                        |      |             | <b>3.31</b> | <b>3.10</b> |                                   |       |              | <b>0.001</b> | <b>0.002</b> |
| Sound only  |                        |      |             |             | <b>2.28</b> |                                   |       |              |              | <b>0.022</b> |

936

937 **Table 3 – Convergence of different sensory streams on individual Purkinje cells**

938 For each type of stimulus, we compared the observed rate of convergence on individual  
 939 Purkinje cells to chance level, using a bootstrap method based on the relative prevalence of  
 940 each stimulus (cf. Fig. 4). Indicated are the Z and the *p* values. All combinations occurred  
 941 more often than expected ( $Z > 0$ ). Bold values indicate statistical significance. WP = whisker  
 942 pad; UL = upper lip; LL = lower lip; Ch = cheek; SO = sound only.

943 **Table 4**

| Stimulation       | Rate of occurrence ( <i>Z</i> ) | Chance of occurrence ( <i>p</i> ) |
|-------------------|---------------------------------|-----------------------------------|
| WP + UL + LL      | 1.89                            | 0.059                             |
| WP + LL + Ch      | 1.32                            | 0.186                             |
| UL + LL + Ch      | 3.22                            | <b>0.001</b>                      |
| WP + UL + LL + Ch | 3.07                            | <b>0.002</b>                      |

944

945 **Table 4 – Convergence of different sensory streams on individual Purkinje cells**

946 For each type of stimulus, we compared the observed rate of convergence on individual  
 947 Purkinje cells to chance level, using a bootstrap method based on the relative prevalence of  
 948 each stimulus (cf. Fig. 4). Indicated are the *Z* and the *p* values. All combinations occurred  
 949 more often than expected ( $Z > 0$ ). Bold values indicate statistical significance. WP = whisker  
 950 pad; UL = upper lip; LL = lower lip; Ch = cheek.

951

952 **Table 5**

| Whisker | Responsive cells |    | Rate of occurrence ( <i>Z</i> ) |       |              |              | Prevalence ( <i>p</i> ) |       |                  |              |
|---------|------------------|----|---------------------------------|-------|--------------|--------------|-------------------------|-------|------------------|--------------|
|         | No.              | %  | C1                              | C2    | C3           | D2           | C1                      | C2    | C3               | D2           |
| B2      | 15 (148)         | 10 | 0.630                           | 0.227 | <b>5.130</b> | <b>2.052</b> | 0.264                   | 0.410 | <b>&lt;0.001</b> | 0.020        |
| C1      | 4 (148)          | 3  |                                 | 0.803 | 0.782        | 0.630        |                         | 0.211 | 0.217            | 0.264        |
| C2      | 17 (148)         | 11 |                                 |       | 0.222        | 0.208        |                         |       | 0.412            | 0.418        |
| C3      | 23 (148)         | 16 |                                 |       |              | <b>3.100</b> |                         |       |                  | <b>0.001</b> |
| D2      | 15 (148)         | 10 |                                 |       |              |              |                         |       |                  |              |

953

954 **Table 5 – Purkinje cell responses to single-whisker stimulation in anaesthetized mice**

955 Purkinje cells respond with complex firing to single-whisker stimulation (cf. Figure 4). For  
 956 each whisker, the number and percentage of responsive cells is indicated (in brackets: total  
 957 number of cells tested). For each whisker, we compared the observed rate of convergence on  
 958 individual Purkinje cells to chance level, using a bootstrap methods based on the relative  
 959 prevalence of each stimulus. Indicated are the *Z* and the *p* values. All combinations occurred  
 960 more often than expected ( $Z > 0$ ). Bold values indicate statistical significance after Benjamini-  
 961 Hochberg correction for multiple comparisons.

962

963 **Figure legends**

964

965 **Figure 1 – Sensory pathways carrying facial input to the cerebellar cortex**

966 (A) Scheme of the main routes conveying facial tactile input via the climbing fibre pathway to  
967 cerebellar Purkinje cells (PC). Climbing fibres, which cause complex spike firing in Purkinje  
968 cells, exclusively originate from the inferior olive. The inferior olive, in turn, is directly  
969 innervated by neurons from the trigeminal nuclei as well as indirectly via thalamo-cortical  
970 pathways that project to the inferior olive mainly via the nuclei of the mesodiencephalic  
971 junction (MDJ). The MDJ itself also receives direct input from the trigeminal nuclei. See the  
972 main text for references. (B) *In vivo* two-photon  $\text{Ca}^{2+}$  imaging was performed to characterize  
973 Purkinje cell complex spike responses to sensory stimulation in the medial part of crus 1.  
974 Purkinje cells were detected using independent component analysis and the position of a  
975 Purkinje cell dendrite (yellow area on the right) within a field of view is shown in the inset. At  
976 the end of each recording session, the brain was removed and the location of the dye injection  
977 in medial crus 1 was confirmed through *ex vivo* epifluorescent imaging (black circle). The  
978 white rectangle indicates the approximate recording location. (C) Complex spikes that were  
979 triggered by climbing fibre activity were retrieved from fluorescent traces of individual  
980 Purkinje cells. A representative trace obtained from the Purkinje cell dendrite illustrated in B  
981 is shown together with the detected complex spikes (grey lines). The light blue episode is  
982 enlarged in D. Complex spikes were detected by the combination of a threshold and a  
983 template matching algorithm. Only events with a sharp rising phase were accepted as complex  
984 spikes. In the 60 s interval shown in C, there was one event with a slower rise time (see arrow  
985 in D), as indicated at a larger time scale in E. The events in E are scaled to peak.

986

987 **Figure 2 - Whisker stimulation evokes complex spike responses in cerebellar crus 1**

988 (A) Complex spikes elicit large increases in the  $\text{Ca}^{2+}$  concentration within Purkinje cell  
989 dendrites that can be resolved using *in vivo* two-photon microscopy in combination with a  
990 fluorescent  $\text{Ca}^{2+}$  indicator. An example of a field of view with 19 identified Purkinje cell  
991 dendrites located in the medial part of crus 1 is shown with each individual dendrite denoted  
992 by a number and a unique colour. This recording was made in an awake mouse. (B) The  
993 fluorescent traces of each of these dendrites show distinct  $\text{Ca}^{2+}$  transient events, which are to a  
994 large extent associated with air puff stimulation of the facial whiskers (times of stimulation  
995 indicated by the vertical lines). The boxed area is enlarged in Fig. S1. (C) Summed  
996 fluorescence trace composed of all 19 individual traces emphasizing the participation of many

997 Purkinje cells to the stimulus-triggered responses. **(D)** After complex spike extraction, a clear  
998 relation between stimulus and activity was observed as illustrated by summing, for each  
999 frame, the number of complex spikes observed over all dendrites. The vertical scale bar  
1000 corresponds to the simultaneous activity of 5 Purkinje cells. **(E)** Peri-stimulus time histogram  
1001 of a Purkinje cell dendrite (marked as number 7 in **A** and **B**) in response to air puff  
1002 stimulation to the ipsilateral whiskers (154 trials). The bin size (40 ms) corresponds to the  
1003 acquisition frame rate (25 Hz). **(F)** Normalized stacked line graph of the Purkinje cells in this  
1004 field of view showing that every cell contributed to the overall response. The Purkinje cells  
1005 are ranked by their maximal response and the data are normalized so that the top line reflects  
1006 the average frequency per bin. Cell no. 7 (dashed line) had a relatively poor signal-to-noise  
1007 ratio during later parts of the recording (see Fig. S1), but it had nevertheless a complex spike  
1008 response profile that was indistinguishable from the other cells. The colours match those in  
1009 the panels **A-B**. Inset: In total, 102 out of 117 cells analysed (87%) were responsive to  
1010 whisker air puff stimulation (peak response exceeded average + 3 s.d. of pre-stimulus  
1011 interval). **(G)** Fluorescent traces of the trials with (red) and without (black) complex spikes  
1012 fired during the first 200 ms after air puff onset. In the absence of complex spike firing, only a  
1013 very small increase in fluorescence was observed, indicating that the majority of change in  
1014 fluorescence was associated with complex spike firing. Note the longer time scale than in **E**  
1015 and **F**. The lines indicate the medians and the shaded areas the inter-quartile ranges of the 19  
1016 Purkinje cells in this field of view.

1017

### 1018 **Figure 3 – Purkinje cells in crus 1 respond to various types of sensory stimulation**

1019 **(A)** Tactile stimuli were presented to four facial regions in awake mice: the whisker pad  
1020 (WP), the upper lip (UL), the lower lip (LL) and the cheek (Ch). Each stimulus was delivered  
1021 with a piezo-actuator that made a muted, yet audible sound which was also delivered without  
1022 touch (“sound only (SO)”). A blue light flash generated by an LED was used as visual  
1023 stimulus. These experiments were performed in awake mice. **(B)** To avoid interference of  
1024 adjacent areas, we applied gentle touches (0.686 mN). The complex spike response ratio was  
1025 much reduced relative to the strong air puff stimulation to all ipsilateral whiskers illustrated in  
1026 Fig. 2. A histogram of the peak responses (expressed as Z value) of all responses to either of  
1027 the four tactile stimuli demonstrates that the response strength is a continuum, showing the  
1028 lack of a clear separation between “responsive” and “non-responsive” Purkinje cells (998  
1029 stimulus conditions in 282 Purkinje cells). We considered Purkinje cells that showed a peak  
1030 response above  $Z = 3$  as “significantly responsive” (represented with black bars), but we

1031 provide most of the analyses also for the population as a whole (e.g., Fig. S2). **(C)** The peri-  
1032 stimulus time histograms (PSTHs) of a representative Purkinje cell. The shades of grey  
1033 indicate 1, 2 and 3 s.d. around the average. Each stimulus was repeated 154 times at 1 Hz. **(D)**  
1034 For every stimulus condition, we averaged the PSTHs for all Purkinje cells that were  
1035 significantly responsive to that particular stimulus (coloured lines; median (inter-quartile  
1036 range)). These were contrasted to the averaged PSTH of the other Purkinje cells (black lines).  
1037 The pie charts represent the fraction of Purkinje cells significantly responsive to a particular  
1038 stimulus. See also Table 1. **(E)** The peak responses of the significantly responding Purkinje  
1039 cells were the lowest for sound only and for upper lip stimulation. \*  $p < 0.05$ ; \*\*  $p < 0.01$   
1040 (post-hoc tests after Kruskal-Wallis test) **(F)** As expected for complex spike responses to  
1041 weak stimulation, the latencies were relatively long and variable, but consistent across types  
1042 of stimulation. Only visual stimulation (LED) had a remarkably longer latency time. \*\*\*  $p <$   
1043 0.001 (post-hoc tests after Kruskal-Wallis test for LED vs. whisker pad, upper lip, lower lip  
1044 and cheek and  $p < 0.05$  compared to sound only)

1045

#### 1046 **Figure 4 – Convergence of sensory input on Purkinje cells**

1047 **(A)** In order to test whether sensory inputs converge on individual Purkinje cells in awake  
1048 mice, we made pair-wise comparisons of the response amplitudes to two different stimuli per  
1049 Purkinje cell (scatter plots). For all possible combinations, we found a positive slope of the  
1050 correlation analysis. For the majority of combinations, the correlation between response  
1051 strengths was highly significant: \*  $p < 0.05$ , \*\*  $p < 0.01$  and \*\*\*  $p < 0.001$  (Pearson  
1052 correlation with Benjamini-Hochberg correction for multiple comparisons). Only upper lip vs.  
1053 sound only and upper lip vs. visual stimulation were not significantly correlated. For this  
1054 analysis, we included all Purkinje cells, whether they had a statistically significant response or  
1055 not. The red dotted lines indicate a Z-score of 3, which we set as the threshold for significance  
1056 (cf. Fig. 3B). The grey arrows indicate the fraction of observations above and below the  
1057 unity line (grey dotted line). The relative strengths of every stimulus combination were  
1058 compared in a pairwise fashion (Wilcoxon tests with Benjamini-Hochberg correction for  
1059 multiple comparisons): &  $p < 0.05$ ; &&  $p < 0.01$ ; &&&  $p < 0.001$ . **(B)** We performed a  
1060 similar analysis focusing only on statistically significant responses (Venn diagrams). Again,  
1061 all combinations had a positive Z score (as evaluated by a bootstrap method; see Methods),  
1062 indicating more than expected convergence. The diameter of each circle indicates the fraction  
1063 of Purkinje cells showing a significant response to that particular, colour coded stimulus. The  
1064 size of the bar represents the Z score of the overlapping fraction. **(C)** The same for the

1065 combinations of three tactile stimuli. Overall, sensory streams tended to converge, rather than  
1066 diverge, on Purkinje cells. #  $p < 0.10$ ; \*  $p < 0.05$ , \*\*  $p < 0.01$  and \*\*\*  $p < 0.001$  (Z test with  
1067 Benjamini-Hochberg correction).

1068

1069 **Figure 5 – Stimulus strength has only a minor impact on complex spike responsiveness**

1070 (A) Movements of all large facial whiskers were performed using a piezo-actuator at three  
1071 different speeds (weak: 1 mm displacement in 62 ms; moderate: 2 mm displacement in 31 ms;  
1072 strong: 4 mm displacement in 16 ms). The stimulus sequence was randomly permuted. The  
1073 recordings were made in awake mice. (B) Field of view with 24 identified and colour-coded  
1074 Purkinje cells (left) and their corresponding fluorescent traces (right). Stimuli were presented  
1075 every 2 s and in between trials the laser illumination was briefly blocked to avoid  
1076 photobleaching. Note that the periods without laser illumination are not drawn to scale. The  
1077 vertical shaded areas indicate stimulus duration (which was inverse with the stimulus  
1078 strength). (C) Summed fluorescence trace composed of all 24 individual traces showing that  
1079 not all trials evoked ensemble-wide responses. Some spontaneous, inter-trial activity was also  
1080 observed. (D) The median number of complex spikes per frame (of 40 ms) per trial (shaded  
1081 areas: inter-quartile range) for the three stimulus strengths show little difference for the weak  
1082 and moderate stimulation. The time course and amplitude (1-4 mm) of the three stimuli is  
1083 schematized at the bottom of the graph. Strong stimulation elicited about 30% more complex  
1084 spikes, as evident from the peak responses for each stimulus intensity. (E) Plotting for each of  
1085 Purkinje cell the average peak response for each stimulus condition results in many  
1086 overlapping lines. Only a few cells stand out in that they show a strong response that  
1087 consistently increases with stimulus strength (red lines on top). The Purkinje cells that showed  
1088 increased responsiveness to stronger stimuli are depicted in red and the others in blue (see  
1089 also Fig. S4A). (F) The same data summarized with box plots for all significantly responsive  
1090 cells. Data are from 209 significantly responsive Purkinje cells (out of 340 Purkinje cells that  
1091 were measured in this way). \*\*\*  $p < 0.001$  (Friedman's test).

1092

1093 **Figure 6 - Purkinje cells encoding the same stimulus have a tendency to be spatially**  
1094 **grouped**

1095 Schematic drawing of a field of view with 26 Purkinje cells organized in the medio-lateral  
1096 direction of crus 1 in an awake mouse. The colour of each Purkinje cell corresponds to the  
1097 maximal response to whisker pad (A) or upper lip (B) stimulation. Purkinje cells with a filled  
1098 soma had a peak response with a Z score  $> 3$  and were considered to be statistically

1099 significant, in contrast to those with an open soma. Responsive and non-responsive cells are  
1100 generally intermingled, but a group of “strong responders” can be observed for whisker pad  
1101 stimulation (red rectangle). **(C)** The anecdotal data in **A** suggest the presence of clusters of  
1102 Purkinje cells encoding specific stimuli. For this to be the case, one would expect that  
1103 neighbouring Purkinje cells have roughly similar response strengths. We found that this  
1104 assumption does not hold as the differences in response strengths of neighbours could not be  
1105 discriminated from randomly selected cells in the same recording if all Purkinje cells are  
1106 considered (compared with bootstrap analysis based upon randomly chosen cell pairs within  
1107 each field of view: all  $p > 0.8$ ; Z test). Data are represented in violin plots, with the grey lines  
1108 indicating the 10<sup>th</sup>, 25<sup>th</sup>, 50<sup>th</sup>, 75<sup>th</sup> and 90<sup>th</sup> percentiles. **(D)** When considering only the  
1109 Purkinje cells with statistically significant responses, spatial grouping does occur. For each  
1110 stimulus type, the black portion of the left bar indicates the fraction of Purkinje cells showing  
1111 a significant response to that stimulus. The filled portion of the right bar indicates the fraction  
1112 of the neighbours (always on the medial side) of these significantly responsive Purkinje cells  
1113 that were also significantly responsive. As can be seen, this fraction is always substantially  
1114 larger than the fraction of significantly responsive Purkinje cells, indicating a tendency of  
1115 similar Purkinje cells to group together. Statistical significance was tested by comparing the  
1116 fraction of Purkinje cells with statistically significant responses and the fraction of neighbours  
1117 of Purkinje cells with statistically significant responses that showed statistically significant  
1118 responses as well (after correction for border effects) using Fisher’s exact test and after  
1119 Benjamini-Hochberg correction for multiple comparisons: \*  $p < 0.05$ ; \*\*\*  $p < 0.001$ .

1120

1121

### 1122 **Figure 7 – Purkinje cell responses to single whisker stimulation show weak clustering**

1123 **(A)** To investigate smaller receptive fields, we sequentially stimulated five of the large facial  
1124 whiskers. To avoid interference with other whiskers during active movement, we performed  
1125 these experiments under ketamine/xylazine anaesthesia. Most Purkinje cells, if responsive to  
1126 single-whisker stimulation, responded only to one of the five whiskers **(B)**. This is illustrated  
1127 by five peri-stimulus time histograms (PSTHs) from a single, representative Purkinje cell.  
1128 This particular cell was sensitive to stimulation of the C3 whisker only. The average and 3 s.d.  
1129 of the baseline firing are indicated (dashed line and grey area). **(C)** Purkinje cells that  
1130 responded to more than one whisker were typically responsive to the more anterior whiskers  
1131 (see also Table 5). The widths of the lines indicate the Z value of the occurrence of multiple  
1132 responses per cell. **(D)** Two recording spots, in close proximity in crus 1 of the same animal,

1133 with the identified Purkinje cell dendritic trees. For each dendrite, the colour indicates the  
1134 whisker(s) to which it was responsive (see legend below with grey denoting the absence of a  
1135 statistically significant response). **(E)** For each of the two recording sites, the average of the  
1136 responsive and the non-responsive Purkinje cells is indicated (to the C3 whisker in the left  
1137 panel and to the C2 whisker in the right panel). Note that only a single cell was responsive to  
1138 C2 stimulation in recording spot 2. The shades indicate inter-quartile ranges. **(F)** Linear  
1139 regression revealed that Purkinje cells that were surrounded by other Purkinje cells responsive  
1140 to the same whisker (same colour code as in **A**) had a tendency to show stronger responses to  
1141 stimulation of that whisker than Purkinje cells that were more isolated. The x-axis represents  
1142 the fraction of Purkinje cells responsive to the particular whisker within the respective field of  
1143 view.  $R = 0.521$ ;  $p < 0.001$ .

1144

### 1145 **Figure 8 – Purkinje cells encoding the same response group together**

1146 **(A)** Representative field of view with Purkinje cell dendrites. Purkinje cells showing  
1147 statistically significant responses to whisker pad stimulation are depicted in shades of red and  
1148 the other cells in shades of blue. **(B)** For each pair of Purkinje cells we calculated the Pearson  
1149 correlation coefficient ( $R$ ) during 1 Hz whisker pad stimulation. The pairs of two Purkinje  
1150 cells that were both statistically significantly responsive to whisker pad stimulation (red  
1151 symbols) had on average a higher level of synchrony than the pairs connecting a responsive  
1152 and a non-responsive Purkinje cell (grey symbols;  $p < 0.001$ ; two-dimensional Kolmogorov-  
1153 Smirnov test). The pairs consisting of two non-responsive Purkinje cells were excluded from  
1154 this analysis. **(C)** Interestingly, even in the absence of sensory stimulation, the pairs of  
1155 Purkinje cells that were both responsive to whisker pad stimulation maintained a higher level  
1156 of synchrony than “heterogeneous pairs”. Thus, Purkinje cells with the same receptive field  
1157 tended to fire more synchronously, even in the absence of stimulation. This analysis was  
1158 expanded in the presence **(D)** and absence **(E)** of sensory stimulation for six different types of  
1159 stimulation and illustrated as the median  $R$  value per distance category (six bin values of  
1160 equal distance at a log scale). The shaded areas represent the inter-quartile ranges. \*  $p < 0.05$ ;  
1161 \*\*\*  $p < 0.001$  (two-dimensional Kolmogorov-Smirnov tests after Benjamini-Hochberg  
1162 correction).



1163 **Figure 9 – Purkinje cells encode strong and weak sensory stimulation via synchronous**  
1164 **firing**

1165 **(A)** Aggregate peri-stimulus time histograms (PSTHs) show that coherent firing of complex  
1166 spikes predominantly occurs following sensory stimulation. For each field of view, we  
1167 calculated the number of complex spikes occurring per frame, summing those of all Purkinje  
1168 cells in that field of view. Subsequently, we made aggregate PSTHs where the colour of each  
1169 bin refers to the number of dendrites simultaneously active. In this field of view, 17 Purkinje  
1170 cells were measured. Of these, 17 (100%) reacted to air puff, 12 (71%) to whisker pad, 3  
1171 (18%) to upper lip, 4 (24%) to lower lip and 1 (6%) to cheek stimulation. **(B)** Based upon a  
1172 Poisson distribution of complex spikes over all dendrites and bins, one would expect between  
1173 0 and 3 simultaneously active dendrites (grey bars). The red bars indicate events involving  
1174 more dendrites simultaneously than expected from a random distribution. Thus, the sparse  
1175 firing as expected by chance is relatively constant throughout the trials, but the simultaneous  
1176 activity of multiple dendrites is strongly enhanced following sensory stimulation. **(C)** A direct  
1177 overlay of the aggregate PSTHs in response to air puff and lower lip stimulation shows that  
1178 the strong response found after air puff stimulation comes at the expense of inter-trial  
1179 complex spikes (152 trials per condition). **(D)** For equally long recordings in the presence of  
1180 different types of stimulation, equal complex spike frequencies were observed as during  
1181 spontaneous activity ( $F(2.544, 20.348) = 2.561, p = 0.091$ , repeated measures ANOVA),  
1182 indicating that sensory stimulation results in a temporal re-ordering of complex spikes, rather  
1183 than to the production of more complex spikes.

1184

1185 **Figure 10 – Sensory stimulation results in a temporal re-ordering of complex spikes**

1186 **(A)** The temporal distribution of complex spikes was compared in a pairwise fashion between  
1187 sessions with sensory stimulation and sessions without. For this analysis, we included only  
1188 Purkinje cells that displayed a statistically significant response to the stimulus involved ( $n =$   
1189 102 for air puff,  $n = 45$  for whisker pad and  $n = 27$  for visual stimulation). The spontaneous  
1190 recordings were analyzed by creating post hoc pseudo-stimuli at the same 1 Hz frequency as  
1191 during sensory stimulation. Shown are the medians of the peri-stimulus time histograms. The  
1192 shaded areas indicate the inter-quartile ranges. **(B)** The reduction in baseline firing, measured  
1193 during the -500 to -250 ms interval, was significant in all cases (Wilcoxon matched-pairs test  
1194 after Benjamini-Hochberg correction for multiple comparisons). **(C)** The larger the response  
1195 amplitude, the stronger the reduction in inter-trial firing (Pearson correlation tests after  
1196 Benjamini-Hochberg correction for multiple comparisons). This analysis was performed on

1197 all Purkinje cells ( $n = 117$  for air puff and whisker pad stimulation and  $n = 60$  for LED  
1198 stimulation; dotted lines mark the criterion for statistical significance at  $Z = 3$ ). Note the  
1199 differences in the x-axis scaling with the air puff evoking relatively stronger responses. \*  $p <$   
1200  $0.05$ ; \*\*\*  $p < 0.001$

1201 **Supporting information**

1202

1203 **Figure S1 - Complex spike detection**

1204

1205 **Figure S2 – Purkinje cells in crus 1 respond to various types of sensory stimulation**

1206

1207 **Figure S3 – Sound only stimulation systematically recruited less complex spikes than**  
1208 **tactile stimulation**

1209

1210 **Figure S4 – Stimulus strength has only a minor impact on complex spike responsiveness**

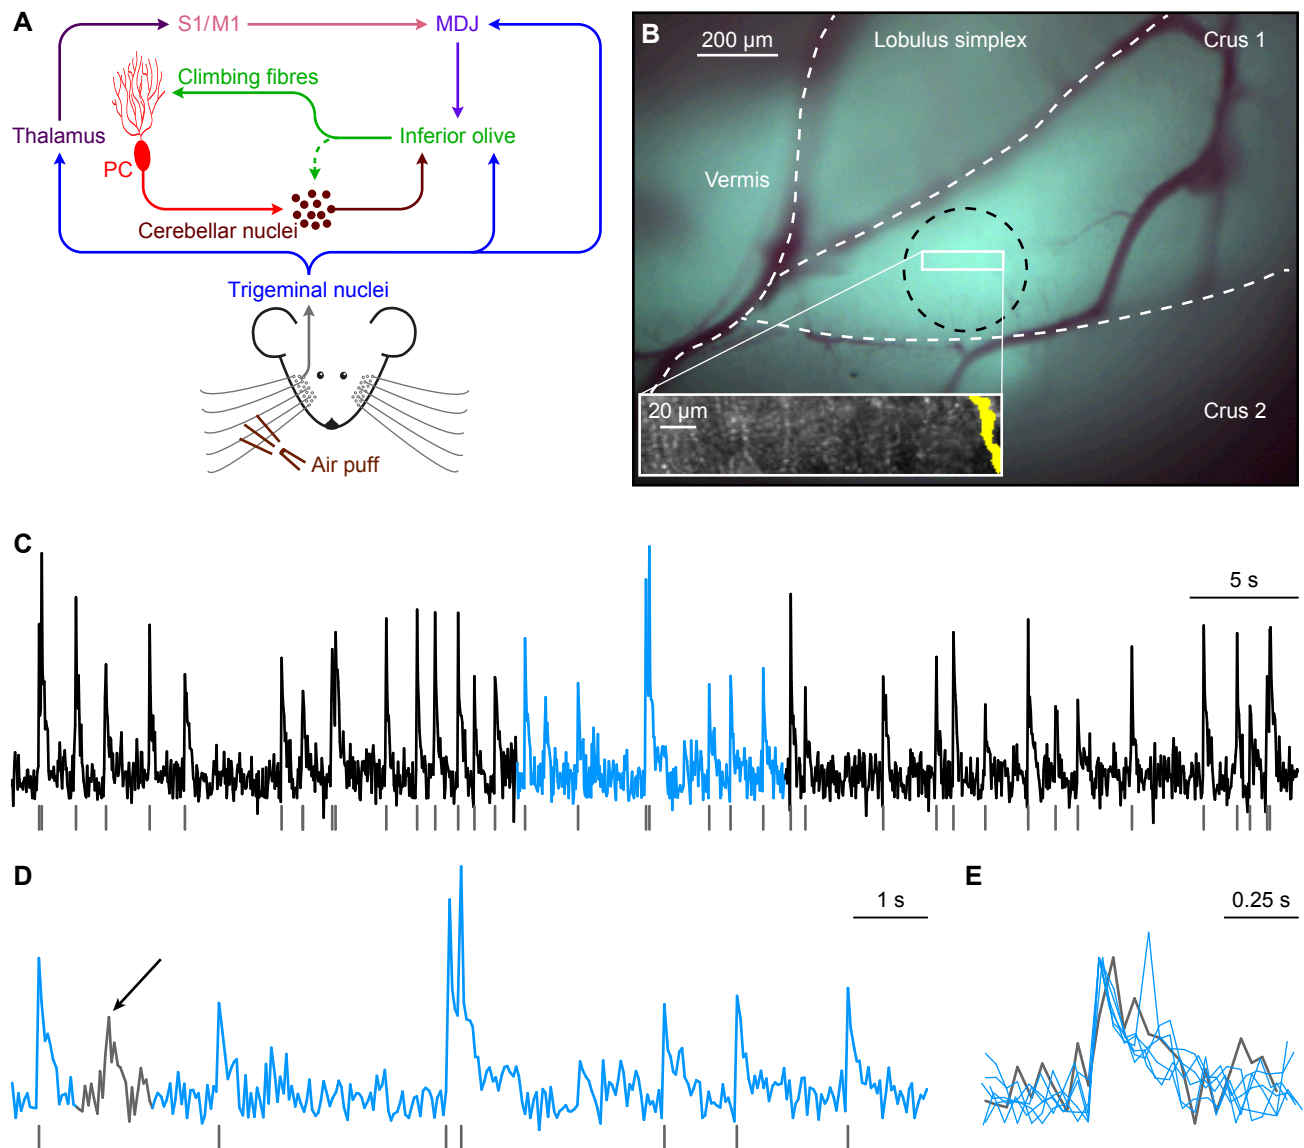

### Figure 1 – Sensory pathways carrying facial input to the cerebellar cortex

**(A)** Scheme of the main routes conveying facial tactile input via the climbing fibre pathway to cerebellar Purkinje cells (PC). Climbing fibres, which cause complex spike firing in Purkinje cells, exclusively originate from the inferior olive. The inferior olive, in turn, is directly innervated by neurons from the trigeminal nuclei as well as indirectly via thalamo-cortical pathways that project to the inferior olive mainly via the nuclei of the mesodiencephalic junction (MDJ). The MDJ itself also receives direct input from the trigeminal nuclei. See the main text for references. **(B)** *In vivo* two-photon  $Ca^{2+}$  imaging was performed to characterize Purkinje cell complex spike responses to sensory stimulation in the medial part of crus 1. Purkinje cells were detected using independent component analysis and the position of a Purkinje cell dendrite (yellow area on

the right) within a field of view is shown in the inset. At the end of each recording session, the brain was removed and the location of the dye injection in medial crus 1 was confirmed through *ex vivo* epifluorescent imaging (black circle). The white rectangle indicates the approximate recording location. **(C)** Complex spikes that were triggered by climbing fibre activity were retrieved from fluorescent traces of individual Purkinje cells. A representative trace obtained from the Purkinje cell dendrite illustrated in **B** is shown together with the detected complex spikes (grey lines). The light blue episode is enlarged in **D**. Complex spikes were detected by the combination of a threshold and a template matching algorithm. Only events with a sharp rising phase were accepted as complex spikes. In the 60 s interval shown in **C**, there was one event with a slower rise time (see arrow in **D**), as indicated at a larger time scale in **E**. The events in **E** are scaled to peak.

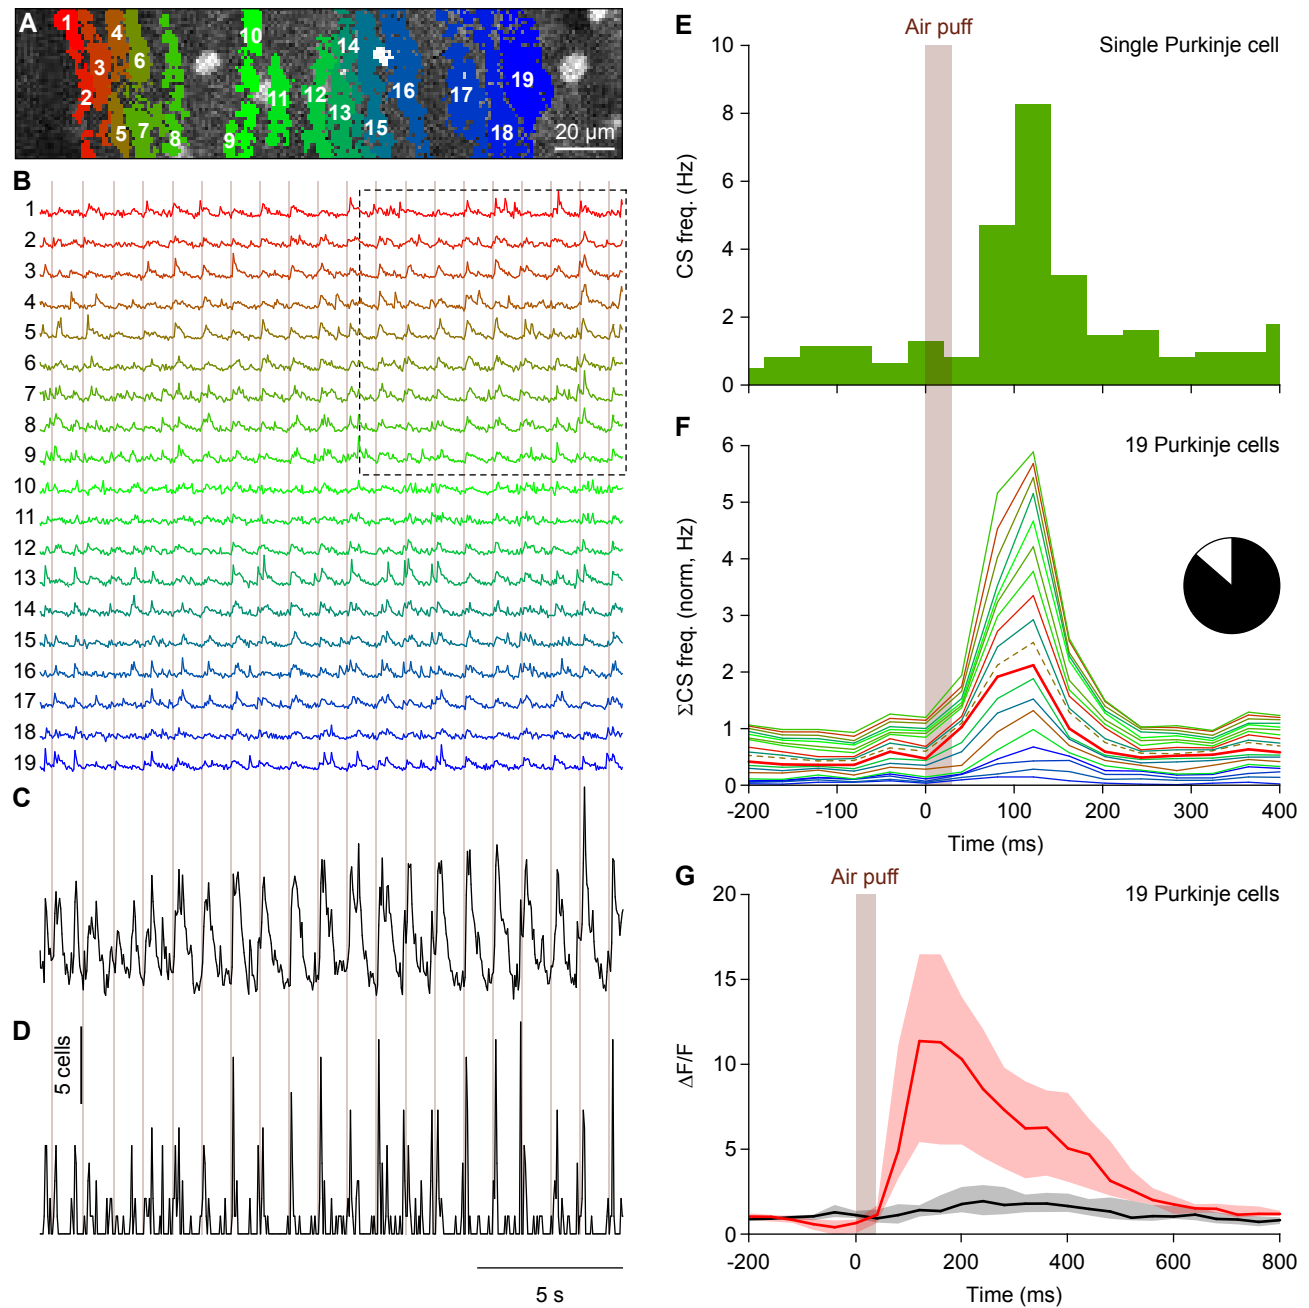

**Figure 2 - Whisker stimulation evokes complex spike responses in cerebellar crus 1**

**(A)** Complex spikes elicit large increases in the  $\text{Ca}^{2+}$  concentration within Purkinje cell dendrites that can be resolved using *in vivo* two-photon microscopy in combination with a fluorescent  $\text{Ca}^{2+}$  indicator. An example of a field of view with 19 identified Purkinje cell dendrites located in the medial part of crus 1 is shown with each individual dendrite denoted by a number and a unique colour. This recording was made in an awake mouse. **(B)** The fluorescent traces of each of these dendrites show distinct  $\text{Ca}^{2+}$  transient events, which are to a large extent associated with air puff stimulation of the facial whiskers (times of stimulation indicated by the vertical lines). The boxed area is enlarged in Fig. S1. **(C)** Summed fluorescence trace composed of all 19 individual traces emphasizing the participation of many Purkinje cells to the stimulus-triggered responses. **(D)** After complex spike extraction, a clear relation between stimulus and activity was observed as illustrated by summing, for each frame, the number of complex spikes observed over all dendrites. The vertical scale bar corresponds to the simultaneous activity of 5 Purkinje cells. **(E)** Peri-stimulus time histogram of a Purkinje cell dendrite (marked as number 7 in **A**

and **B**) in response to air puff stimulation to the ipsilateral whiskers (154 trials). The bin size (40 ms) corresponds to the acquisition frame rate (25 Hz). **(F)** Normalized stacked line graph of the Purkinje cells in this field of view showing that every cell contributed to the overall response. The Purkinje cells are ranked by their maximal response and the data are normalized so that the top line reflects the average frequency per bin. Cell no. 7 (dashed line) had a relatively poor signal-to-noise ratio during later parts of the recording (see Fig. S1), but it had nevertheless a complex spike response profile that was indistinguishable from the other cells. The colours match those in the panels **A-B**. Inset: In total, 102 out of 117 cells analysed (87%) were responsive to whisker air puff stimulation (peak response exceeded average + 3 s.d. of pre-stimulus interval). **(G)** Fluorescent traces of the trials with (red) and without (black) complex spikes fired during the first 200 ms after air puff onset. In the absence of complex spike firing, only a very small increase in fluorescence was observed, indicating that the majority of change in fluorescence was associated with complex spike firing. Note the longer time scale than in **E** and **F**. The lines indicate the medians and the shaded areas the inter-quartile ranges of the 19 Purkinje cells in this field of view.

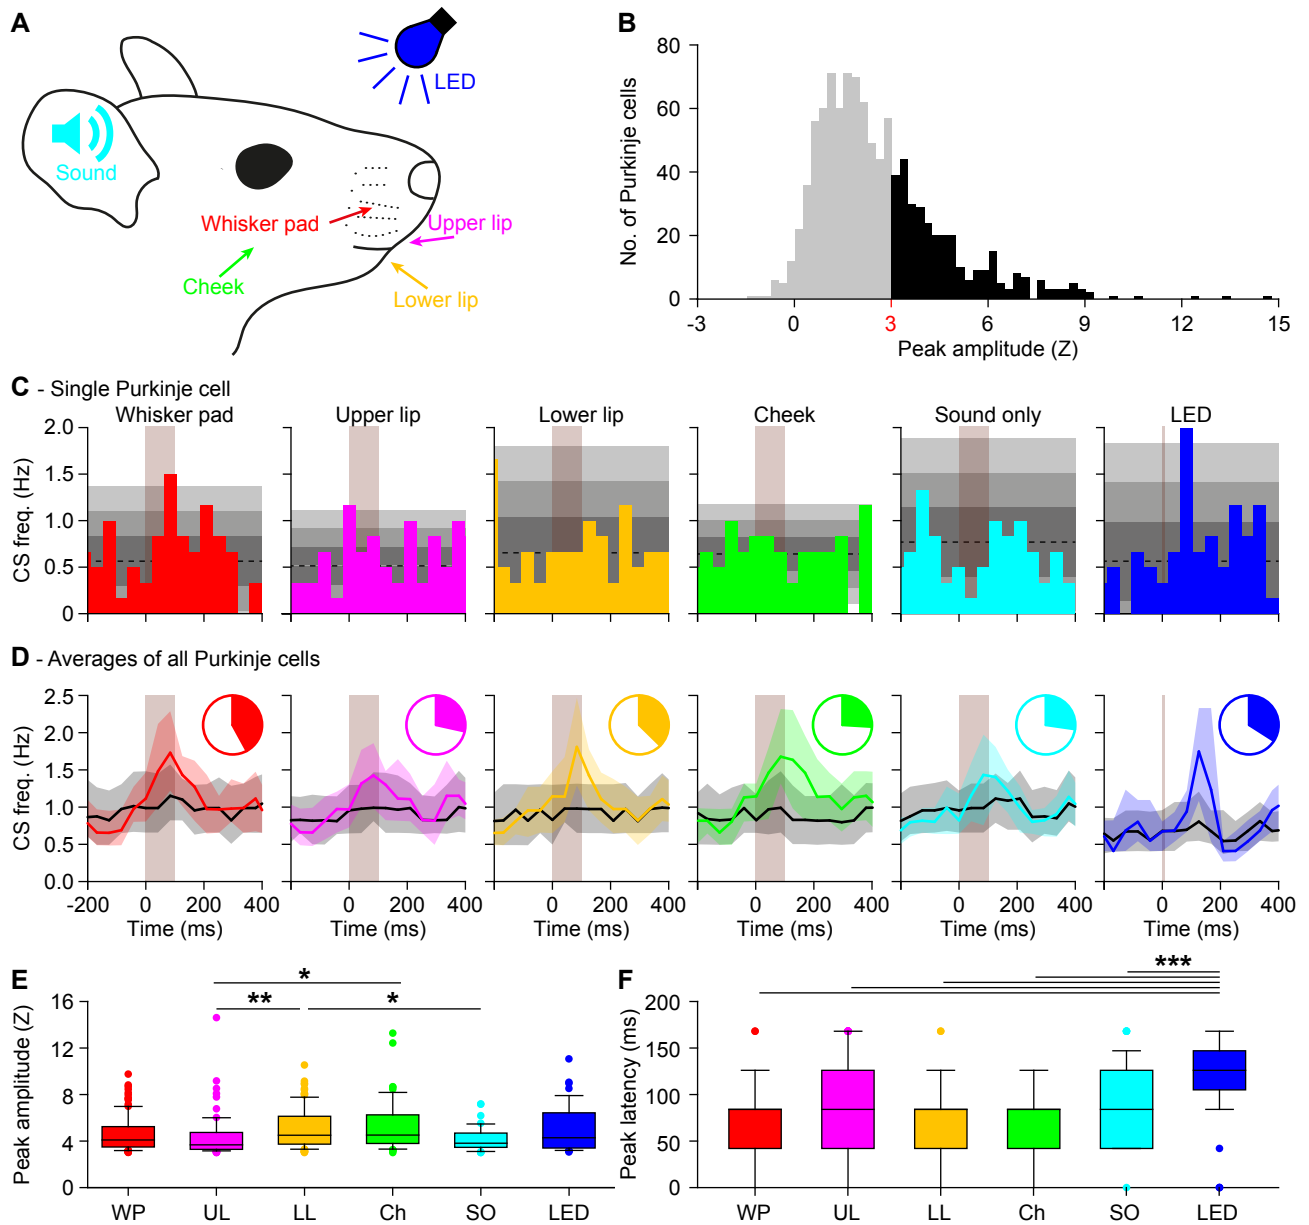

**Figure 3 – Purkinje cells in crus 1 respond to various types of sensory stimulation**

(A) Tactile stimuli were presented to four facial regions in awake mice: the whisker pad (WP), the upper lip (UL), the lower lip (LL) and the cheek (Ch). Each stimulus was delivered with a piezo-actuator that made a muted, yet audible sound which was also delivered without touch (“sound only (SO)”). A blue light flash generated by an LED was used as visual stimulus. These experiments were performed in awake mice. (B) To avoid interference of adjacent areas, we applied gentle touches (0.686 mN). The complex spike response ratio was much reduced relative to the strong air puff stimulation to all ipsilateral whiskers illustrated in Fig. 2. A histogram of the peak responses (expressed as Z value) of all responses to either of the four tactile stimuli demonstrates that the response strength is a continuum, showing the lack of a clear separation between “responsive” and “non-responsive” Purkinje cells (998 stimulus conditions in 282 Purkinje cells). We considered Purkinje cells that showed a peak response above  $Z = 3$  as “significantly responsive” (represented with black bars), but we provide most of the analyses also for the population as a whole

(e.g., Fig. S2). (C) The peri-stimulus time histograms (PSTHs) of a representative Purkinje cell. The shades of grey indicate 1, 2 and 3 s.d. around the average. Each stimulus was repeated 154 times at 1 Hz. (D) For every stimulus condition, we averaged the PSTHs for all Purkinje cells that were significantly responsive to that particular stimulus (coloured lines; medians (inter-quartile range)). These were contrasted to the averaged PSTH of the other Purkinje cells (black lines). The pie charts represent the fraction of Purkinje cells significantly responsive to a particular stimulus. See also Table 1. (E) The peak responses of the significantly responding Purkinje cells were the lowest for sound only and for upper lip stimulation. \*  $p < 0.05$ ; \*\*  $p < 0.01$  (post-hoc tests after Kruskal-Wallis test) (F) As expected for complex spike responses to weak stimulation, the latencies were relatively long and variable, but consistent across types of stimulation. Only visual stimulation (LED) had a remarkably longer latency time. \*\*\*  $p < 0.001$  (post-hoc tests after Kruskal-Wallis test for LED vs. whisker pad, upper lip, lower lip and cheek and  $p < 0.05$  compared to sound only)

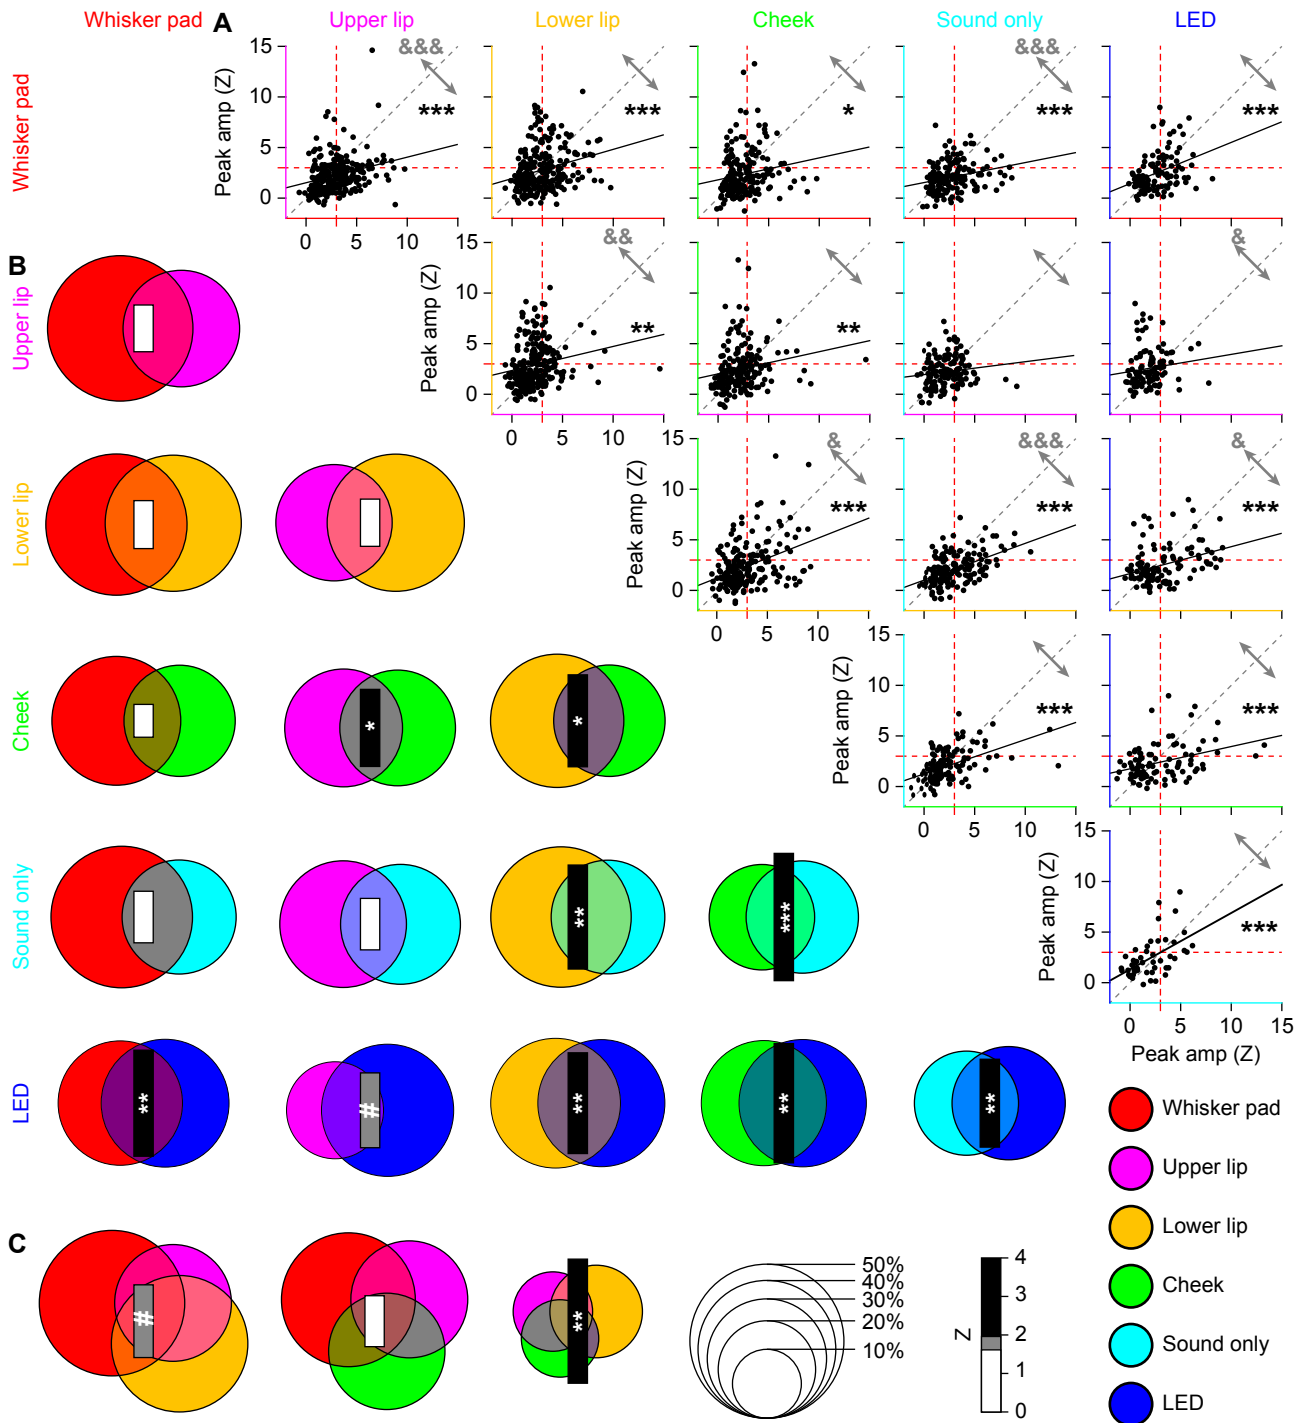

#### Figure 4 – Convergence of sensory input on Purkinje cells

**(A)** In order to test whether sensory inputs converge on individual Purkinje cells in awake mice, we made pair-wise comparisons of the response amplitudes to two different stimuli per Purkinje cell (scatter plots). For all possible combinations, we found a positive slope of the linear regression analysis. For the majority of combinations, the correlation between response strengths was highly significant: \*  $p < 0.05$ , \*\*  $p < 0.01$  and \*\*\*  $p < 0.001$  (Pearson correlation with Benjamini-Hochberg correction for multiple comparisons). Only upper lip vs. sound only and upper lip vs. visual stimulation were not significantly correlated. For this analysis, we included all Purkinje cells, whether they had a statistically significant response or not. The red dotted lines indicate a Z-score of 3, which we set as the threshold for significance (cf. Fig. 3B). They grey arrows indicate the fraction of observations above

and below the unity line (grey dotted line). The relative strengths of every stimulus combination were compared in a pairwise fashion (Wilcoxon tests with Benjamini-Hochberg correction for multiple comparisons): &  $p < 0.05$ ; &&  $p < 0.01$ ; &&&  $p < 0.001$ . **(B)** We performed a similar analysis focusing only on statistically significant responses (Venn diagrams). Again, all combinations had a positive Z score (as evaluated by a bootstrap method; see Methods), indicating more than expected convergence. The diameter of each circle indicates the fraction of Purkinje cells showing a significant response to that particular, colour coded stimulus. The size of the bar represents the Z score of the overlapping fraction. **(C)** The same for the combinations of three tactile stimuli. Overall, sensory streams tended to converge, rather than diverge, on Purkinje cells. #  $p < 0.10$ ; \*  $p < 0.05$ , \*\*  $p < 0.01$  and \*\*\*  $p < 0.001$  (Z test with Benjamini-Hochberg correction).

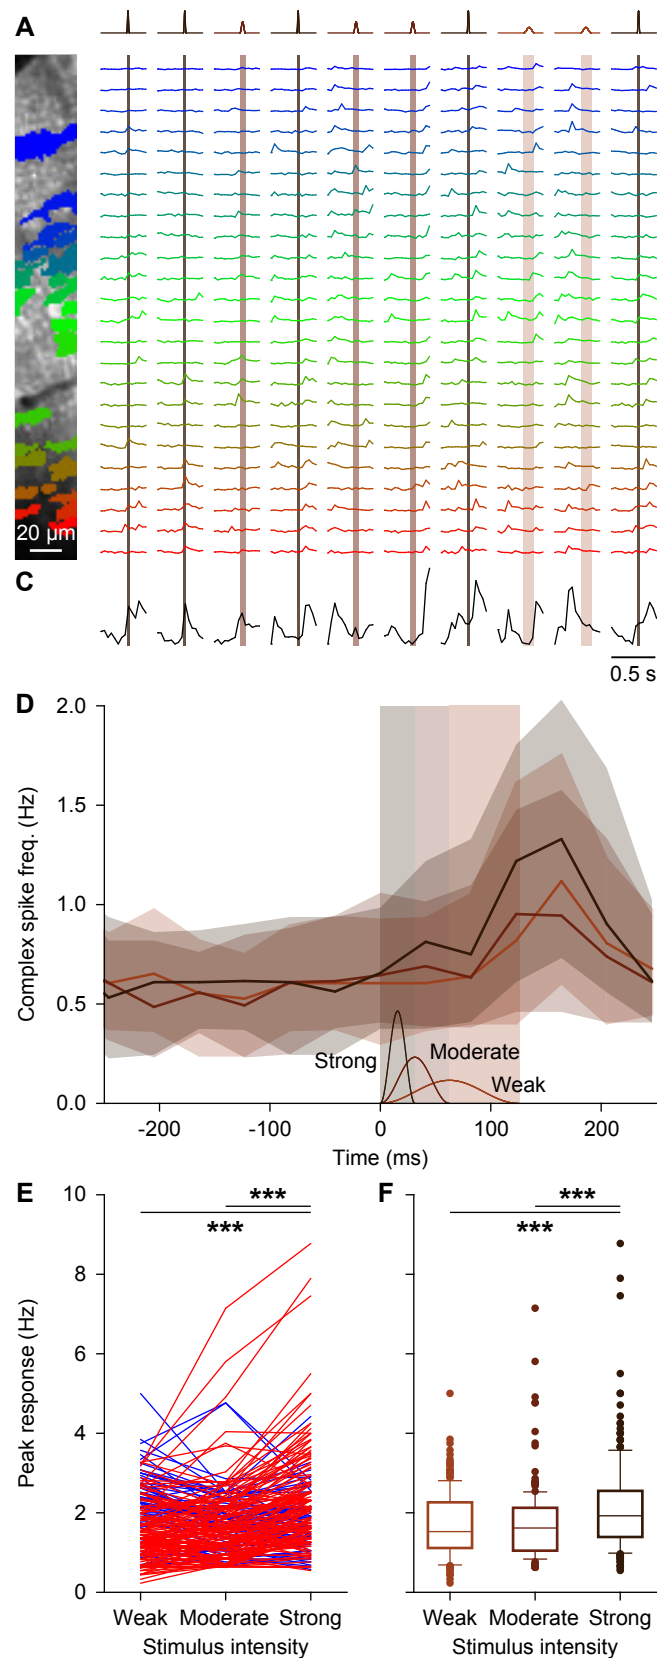

**Figure 5 – Stimulus strength has only a minor impact on complex spike responsiveness**

**(A)** Movements of all large facial whiskers were performed using a piezo-actuator at three different speeds (weak: 1 mm displacement in 62 ms; moderate: 2 mm displacement in 31 ms; strong: 4 mm displacement in 16 ms). The stimulus sequence was randomly permuted. The recordings were made in awake mice. **(B)** Field of view with 24 identified and colour-coded Purkinje cells (left) and their corresponding fluorescent traces (right). Stimuli were presented every 2 s and in between trials the laser illumination was briefly blocked to avoid photobleaching. Note that the periods without laser illumination are not drawn to scale. The vertical shaded areas indicate stimulus duration (which was inverse with the stimulus strength). **(C)** Summed fluorescence trace composed of all 24 individual traces showing that not all trials evoked ensemble-wide responses. Some spontaneous, inter-trial activity was also observed. **(D)** The median number of complex spikes

per frame (of 40 ms) per trial (shaded areas: inter-quartile range) for the three stimulus strengths show little difference for the weak and moderate stimulation. The time course and amplitude (1-4 mm) of the three stimuli is schematized at the bottom of the graph. Strong stimulation elicited about 30% more complex spikes, as evident from the peak responses for each stimulus intensity. **(E)** Plotting for each of Purkinje cell the average peak response for each stimulus condition results in many overlapping lines. Only a few cells stand out in that they show a strong response that consistently increases with stimulus strength (red lines on top). The Purkinje cells that showed increased responsiveness to stronger stimuli are depicted in red and the others in blue (see also Fig. S4A). **(F)** The same data summarized with box plots for all 209 significantly responsive cells. Data are from 209 significantly responsive Purkinje cells (out of 340 Purkinje cells that were measured in this way). \*\*\*  $p < 0.001$  (Friedman's test).



**A - Whisker pad**

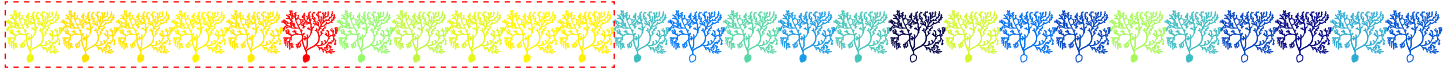

**B - Upper lip**

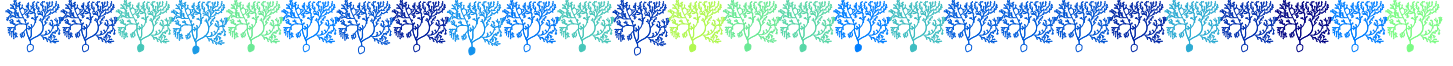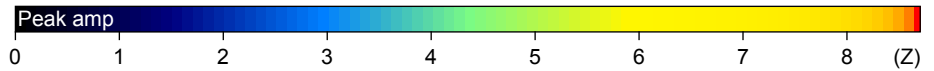

**C - All cells**

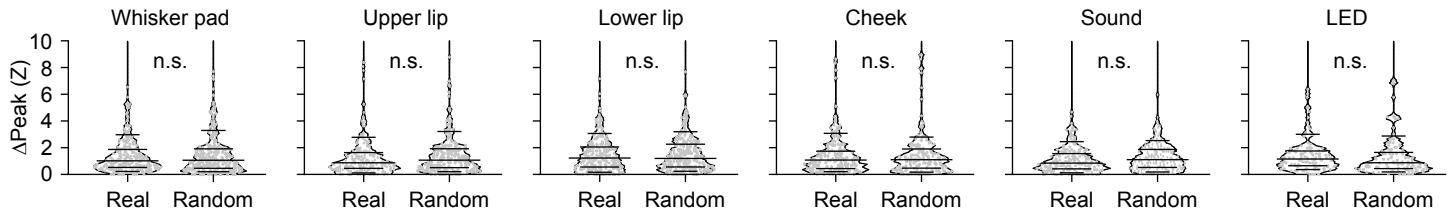

**D - Only significantly responsive cells**

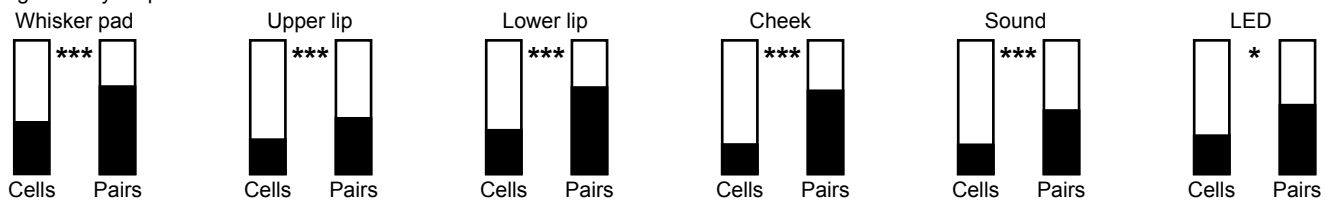

**Figure 6 - Purkinje cells encoding the same stimulus have a tendency to be spatially grouped**

Schematic drawing of a field of view with 26 Purkinje cells organized in the medio-lateral direction of crus 1 in an awake mouse. The colour of each Purkinje cell corresponds to the maximal response to whisker pad (A) or upper lip (B) stimulation. Purkinje cells with a filled soma had a peak response with a Z score > 3 and were considered to be statistically significant, in contrast to those with an open soma. Responsive and non-responsive cells are generally intermingled, but a group of “strong responders” can be observed for whisker pad stimulation (red rectangle). (C) The anecdotal data in A suggest the presence of clusters of Purkinje cells encoding specific stimuli. For this to be the case, one would expect that neighbouring Purkinje cells have roughly similar response strengths. We found that this assumption does not hold as the differences in response strengths of neighbours could not be discriminated from randomly selected cells in the same recording if all Purkinje cells are considered (compared with bootstrap analysis based upon randomly chosen cell pairs within each field

of view: all  $p > 0.8$ ; Z test). Data are represented in violin plots, with the grey lines indicating the 10<sup>th</sup>, 25<sup>th</sup>, 50<sup>th</sup>, 75<sup>th</sup> and 90<sup>th</sup> percentiles. (D) When considering only the Purkinje cells with statistically significant responses, spatial grouping does occur. For each stimulus type, the black portion of the left bar indicates the fraction of Purkinje cells showing a significant response to that stimulus. The filled portion of the right bar indicates the fraction of the neighbours (always on the medial side) of these significantly responsive Purkinje cells that were also significantly responsive. As can be seen, this fraction is always substantially larger than the fraction of significantly responsive Purkinje cells, indicating a tendency of similar Purkinje cells to group together. Statistical significance was tested by comparing the fraction of Purkinje cells with statistically significant responses and the fraction of neighbours of Purkinje cells with statistically significant responses that showed statistically significant responses as well (after correction for border effects) using Fisher’s exact test and after Benjamini-Hochberg correction for multiple comparisons: \*  $p < 0.05$ ; \*\*\*  $p < 0.001$ .

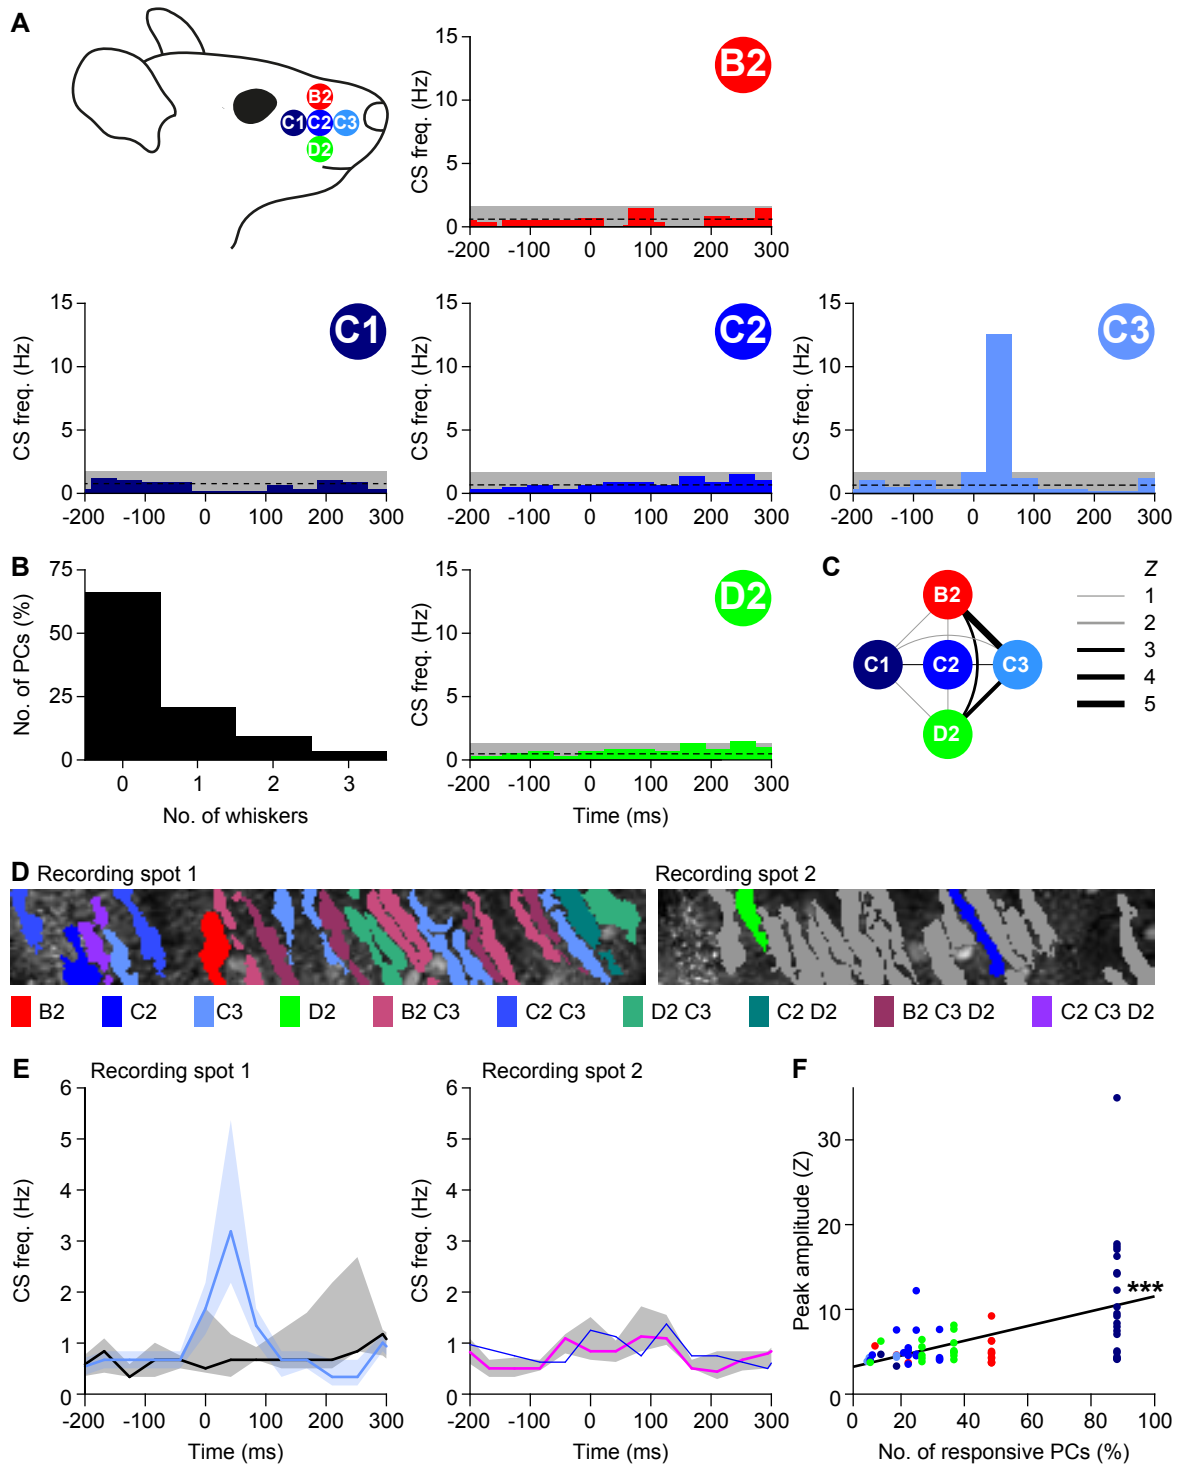

### Figure 7 – Purkinje cell responses to single whisker stimulation show weak clustering

**(A)** To investigate smaller receptive fields, we sequentially stimulated five of the large facial whiskers. To avoid interference with other whiskers during active movement, we performed these experiments under ketamine/xylazine anesthesia. Most Purkinje cells, if responsive to single-whisker stimulation, responded only to one of the five whiskers **(B)**. This is illustrated by five peri-stimulus time histograms (PSTHs) from a single, representative Purkinje cell. This particular cell was sensitive to stimulation of the C3 whisker only. The average and 3 s.d. of the baseline firing are indicated (dashed line and grey area). **(C)** Purkinje cells that responded to more than one whisker were typically responsive to the more anterior whiskers (see also Table 5). The widths of the lines indicate the Z value of the occurrence of multiple responses per cell. **(D)** Two recording spots, in close proximity in crus 1 of the same animal, with the identified Purkinje cell dendritic trees.

For each dendrite, the colour indicates the whisker(s) to which it was responsive (see legend below with grey denoting the absence of a statistically significant response). **(E)** For each of the two recording sites, the medians of the responsive and the non-responsive Purkinje cells are indicated (to the C3 whisker in the left panel and to the C2 whisker in the right panel). Note that only a single cell was responsive to C2 stimulation in recording spot 2. The shades indicate inter-quartile ranges. **(F)** Linear regression revealed that Purkinje cells that were surrounded by other Purkinje cells responsive to the same whisker (same colour code as in **A**) had a tendency to show stronger responses to stimulation of that whisker than Purkinje cells that were more isolated. The x-axis represents the fraction of Purkinje cells responsive to the particular whisker within the respective field of view.  $R = 0.521$ ;  $p < 0.001$ .

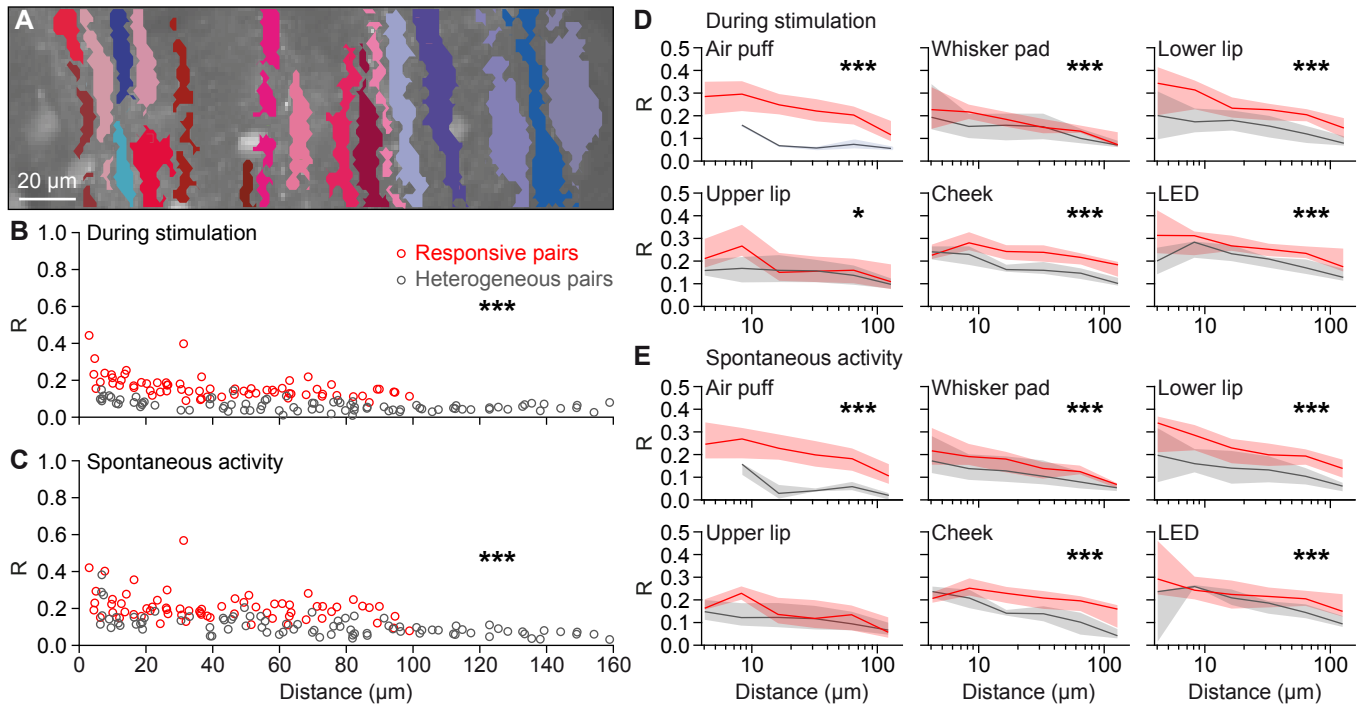

**Figure 8 – Purkinje cells encoding the same response group together**

**(A)** Representative field of view with Purkinje cell dendrites. Purkinje cells showing statistically significant responses to whisker pad stimulation are depicted in shades of red and the other cells in shades of blue. **(B)** For each pair of Purkinje cells we calculated the Pearson correlation coefficient (R) during 1 Hz whisker pad stimulation. The pairs of two Purkinje cells that were both statistically significantly responsive to whisker pad stimulation (red symbols) had on average a higher level of synchrony than the pairs connecting a responsive and a non-responsive Purkinje cell (grey symbols;  $p < 0.001$ ; two-dimensional Kolmogorov-Smirnov test). The pairs consisting of two non-responsive Purkinje

cells were excluded from this analysis. **(C)** Interestingly, even in the absence of sensory stimulation, the pairs of Purkinje cells that were both responsive to whisker pad stimulation maintained a higher level of synchrony than “heterogeneous pairs”. Thus, Purkinje cells with the same receptive field tended to fire more synchronously, even in the absence of stimulation. This analysis was expanded in the presence **(D)** and absence **(E)** of sensory stimulation for six different types of stimulation and illustrated as the median R value per distance category (six bin values of equal distance at a log scale). The shaded areas represent the inter-quartile ranges.  $*$   $p < 0.05$ ;  $***$   $p < 0.001$  (two-dimensional Kolmogorov-Smirnov tests after Benjamini-Hochberg correction).

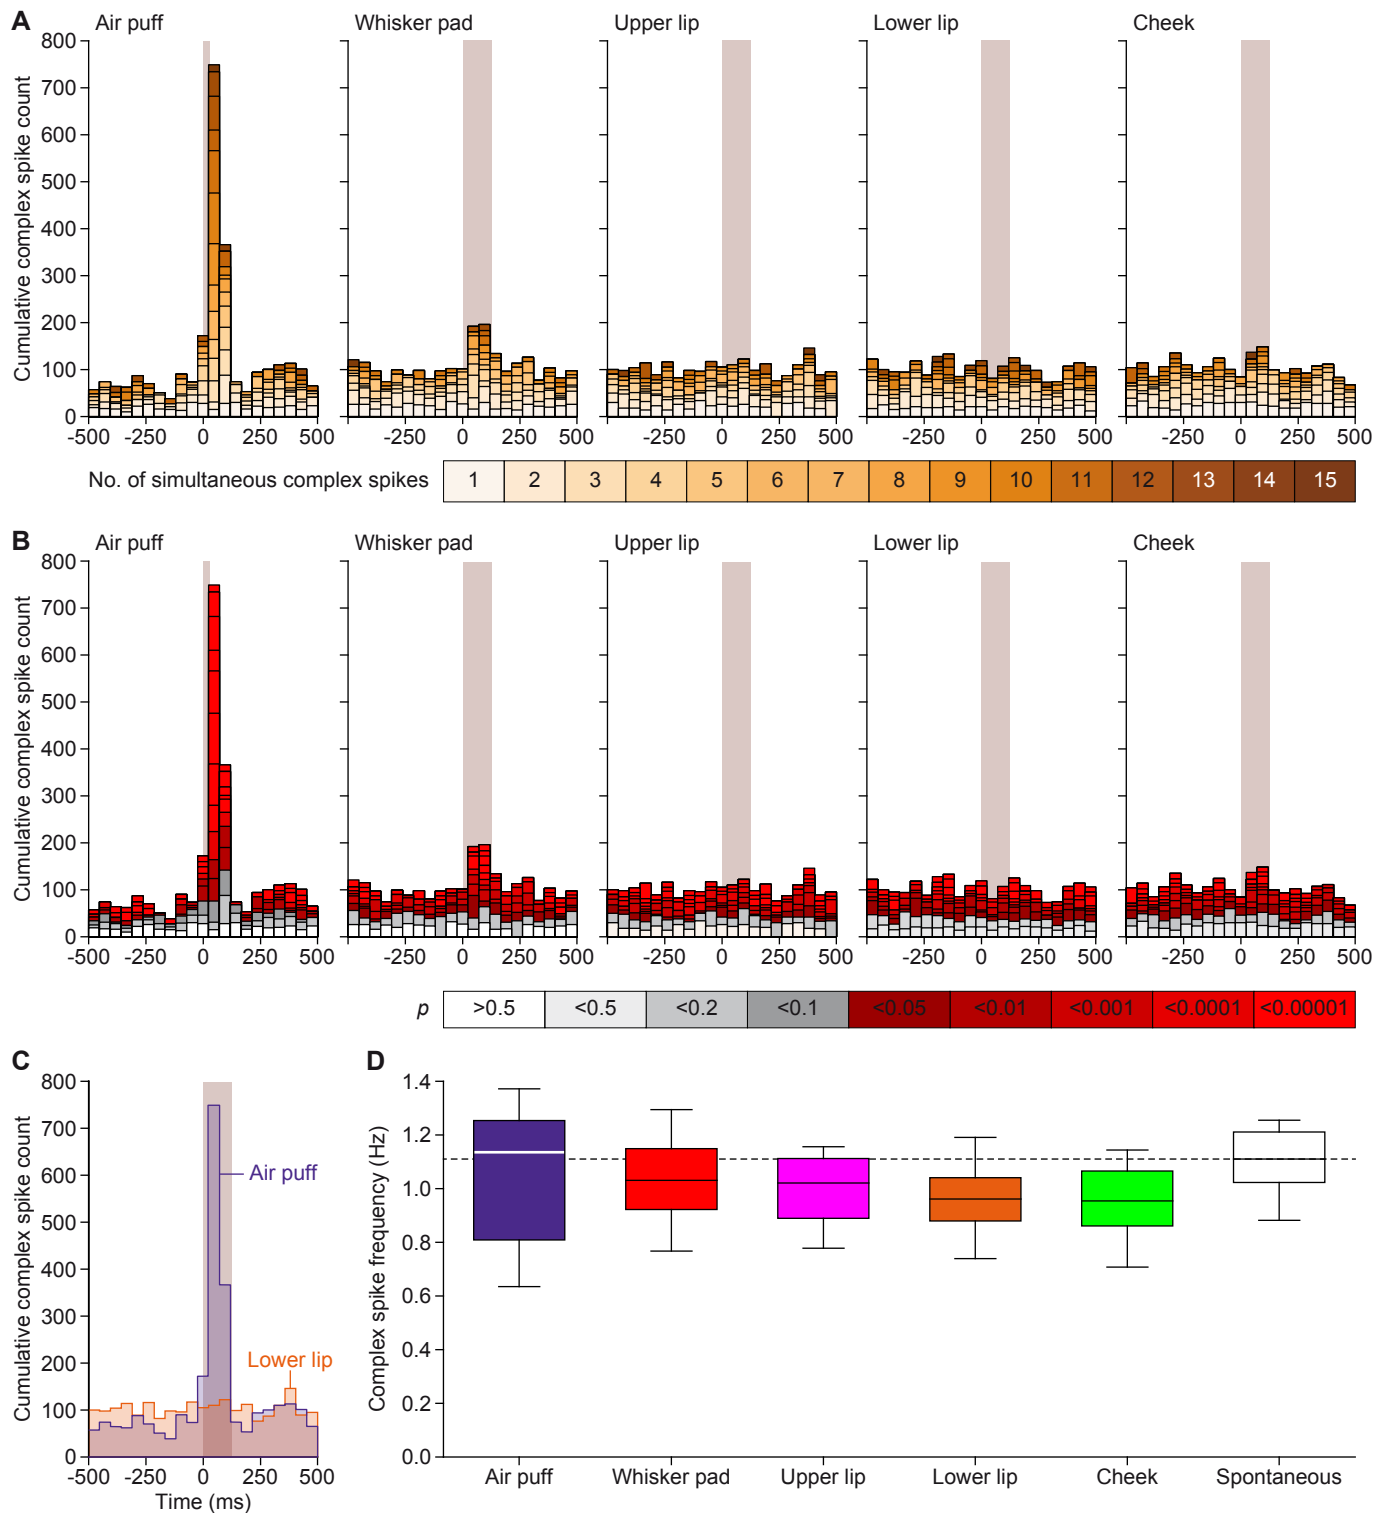

**Figure 9 – Purkinje cells encode strong and weak sensory stimulation via synchronous firing**

**(A)** Aggregate peri-stimulus time histograms (PSTHs) show that coherent firing of complex spikes predominantly occurs following sensory stimulation. For each field of view, we calculated the number of complex spikes occurring per frame, summing those of all Purkinje cells in that field of view. Subsequently, we made aggregate PSTHs where the colour of each bin refers to the number of dendrites simultaneously active. In this field of view, 17 Purkinje cells were measured. Of these, 17 (100%) reacted to air puff, 12 (71%) to whisker pad, 3 (18%) to upper lip, 4 (24%) to lower lip and 1 (6%) to cheek stimulation.

**(B)** Based upon a Poisson distribution of complex spikes over all dendrites and bins, one would expect between 0 and 3 simultaneously active dendrites (grey bars). The red bars indicate events involving

more dendrites simultaneously than expected from a random distribution. Thus, the sparse firing as expected by chance is relatively constant throughout the trials, but the simultaneous activity of multiple dendrites is strongly enhanced following sensory stimulation. **(C)** A direct overlay of the aggregate PSTHs in response to air puff and lower lip stimulation shows that the strong response found after air puff stimulation comes at the expense of intertrial complex spikes (152 trials per condition). **(D)** For equally long recordings in the presence of different types of stimulation, equal complex spike frequencies were observed as during spontaneous activity ( $F(2.544, 20.348) = 2.561$ ,  $p = 0.091$ , repeated measures ANOVA), indicating that sensory stimulation results in a temporal re-ordering of complex spikes, rather than to the production of more complex spikes.

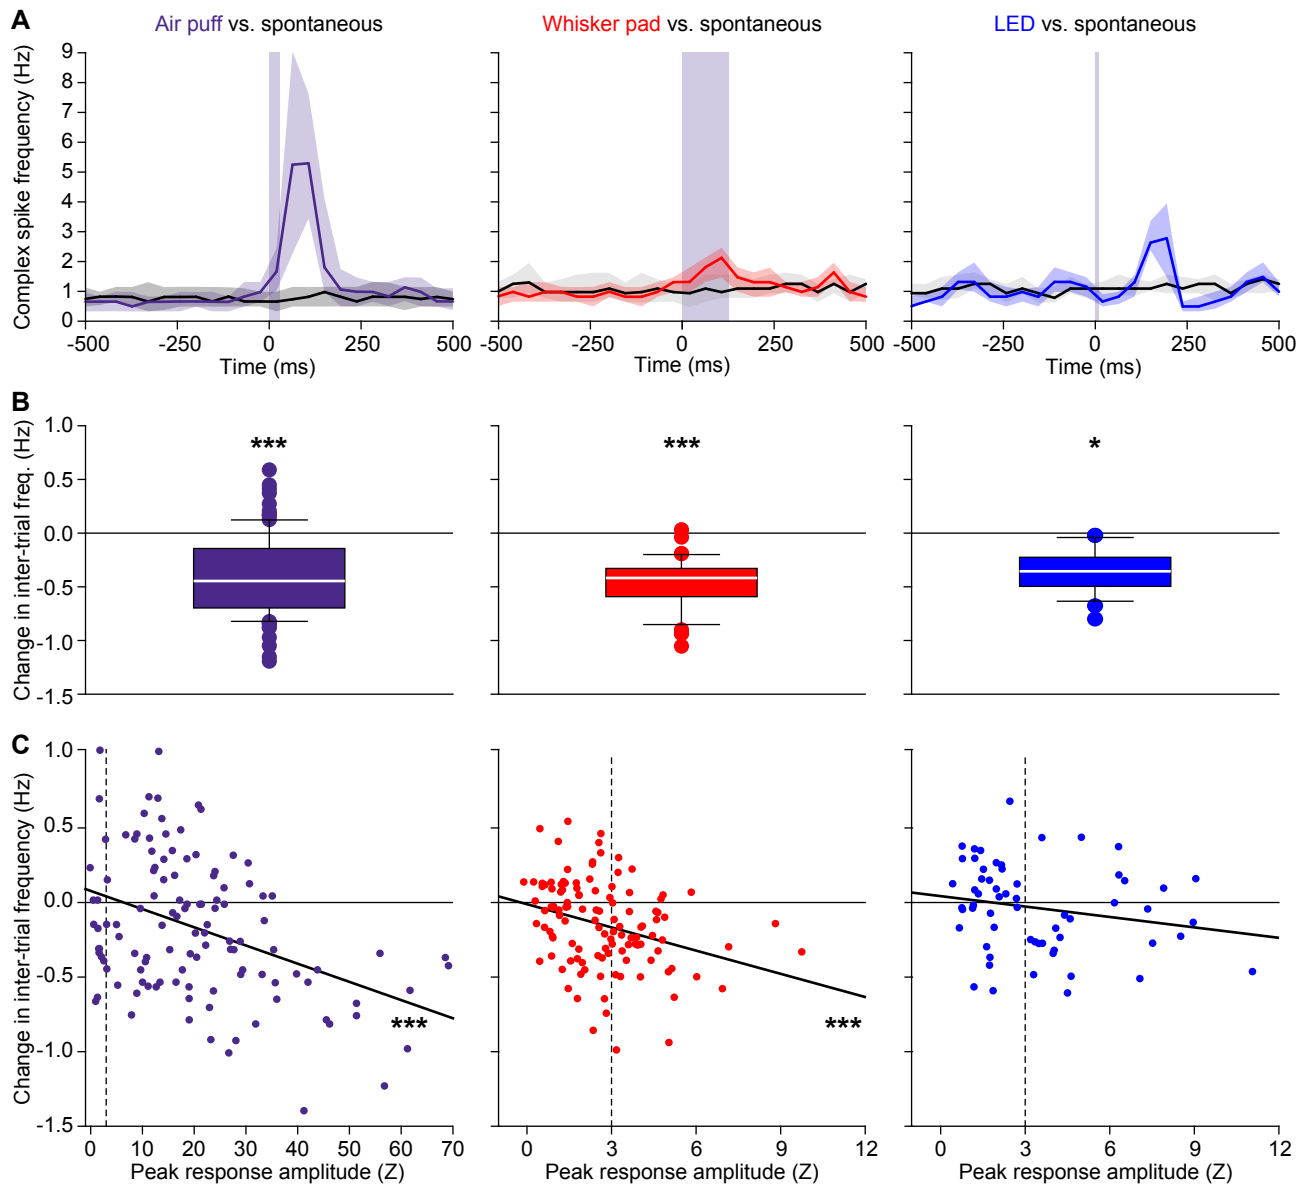

**Figure 10 – Sensory stimulation results in a temporal re-ordering of complex spikes**

**(A)** The temporal distribution of complex spikes was compared in a pairwise fashion between sessions with sensory stimulation and sessions without. For this analysis, we included only Purkinje cells that displayed a statistically significant response to the stimulus involved ( $n = 102$  for air puff,  $n = 45$  for whisker pad and  $n = 27$  for visual stimulation). The spontaneous recordings were analyzed by creating *post hoc* pseudo-stimuli at the same 1 Hz frequency as during sensory stimulation. Shown are the medians of the peri-stimulus time histograms. The shaded areas indicate the inter-quartile ranges. **(B)** The reduction in

baseline firing, measured during the -500 to -250 ms interval, was significant in all cases (Wilcoxon matched-pairs test after Benjamini-Hochberg correction for multiple comparisons). **(C)** The larger the response amplitude, the stronger the reduction in inter-trial firing (Pearson correlation tests after Benjamini-Hochberg correction for multiple comparisons). This analysis was performed on all Purkinje cells ( $n = 117$  for air puff and whisker pad stimulation and  $n = 60$  for LED stimulation; dotted lines mark the criterion for statistical significance at  $Z = 3$ ). Note the differences in the x-axis scaling with the air puff evoking relatively stronger responses. \*  $p < 0.05$ ; \*\*\*  $p \leq 0.001$
